# Supplementary material for: Phase III, multicentre, randomised, double-blind, placebo-controlled, 104-week study of subcutaneous belimumab administered in combination with rituximab in adults with systemic lupus erythematosus (SLE): BLISS-BELIEVE study protocol
Source: PubMed Central journal article supplement — BMJ Open. 2019 Mar 20;9(3):e025687. doi: 10.1136/bmjopen-2018-025687 (PMC6475247; doi:10.1136/bmjopen-2018-025687), 2019-03-20
Supplement: bmjopen-2018-025687.draft_revisions.pdf [file bmjopen-2018-025687.draft_revisions.pdf]

# BMJ Open

BMJ Open is committed to open peer review. As part of this commitment we make the peer review history of every article we publish publicly available.

When an article is published we post the peer reviewers' comments and the authors' responses online. We also post the versions of the paper that were used during peer review. These are the versions that the peer review comments apply to.

The versions of the paper that follow are the versions that were submitted during the peer review process. They are not the versions of record or the final published versions. They should not be cited or distributed as the published version of this manuscript.

BMJ Open is an open access journal and the full, final, typeset and author-corrected version of record of the manuscript is available on our site with no access controls, subscription charges or pay-per-view fees (<http://bmjopen.bmj.com>).

If you have any questions on BMJ Open's open peer review process please email [info.bmjopen@bmj.com](mailto:info.bmjopen@bmj.com)

# BMJ Open

**A Phase 3, multicentre, randomised, double-blind, placebo-controlled, 104-week study of subcutaneous belimumab administered in combination with rituximab in adults with systemic lupus erythematosus (SLE): BLISS-BELIEVE study protocol**

|                               |                                                                                                                                                                                                                                                                                                                                                                                                                                                                                                                                                                                                                                                                                                                                                                       |
|-------------------------------|-----------------------------------------------------------------------------------------------------------------------------------------------------------------------------------------------------------------------------------------------------------------------------------------------------------------------------------------------------------------------------------------------------------------------------------------------------------------------------------------------------------------------------------------------------------------------------------------------------------------------------------------------------------------------------------------------------------------------------------------------------------------------|
| Journal:                      | <i>BMJ Open</i>                                                                                                                                                                                                                                                                                                                                                                                                                                                                                                                                                                                                                                                                                                                                                       |
| Manuscript ID                 | bmjopen-2018-025687                                                                                                                                                                                                                                                                                                                                                                                                                                                                                                                                                                                                                                                                                                                                                   |
| Article Type:                 | Protocol                                                                                                                                                                                                                                                                                                                                                                                                                                                                                                                                                                                                                                                                                                                                                              |
| Date Submitted by the Author: | 14-Aug-2018                                                                                                                                                                                                                                                                                                                                                                                                                                                                                                                                                                                                                                                                                                                                                           |
| Complete List of Authors:     | Teng, Y.K Onno; Leiden University Medical Center, Department of Nephrology<br>Bruce, Ian; Arthritis Research UK Centre for Epidemiology, The University of Manchester and NIHR Manchester Biomedical Research Centre, Manchester University Hospitals NHS Foundation Trust, Manchester Academic Health Science Centre<br>Diamond, Betty; Feinstein Institute for Medical Research, Autoimmune, Musculoskeletal and Hematopoietic Diseases<br>Furie, Richard; Division of Rheumatology, Northwell Health<br>van Vollenhoven, Ronald; ARC, Rheumatology<br>Gordon, David; GlaxoSmithKline*, At the time of protocol development<br>Groark, James; GlaxoSmithKline,<br>Henderson, Robert; GlaxoSmithKline<br>Oldham, Mary; GlaxoSmithKline<br>Tak, Paul; GlaxoSmithKline |
| Keywords:                     | Clinical trials < THERAPEUTICS, Rheumatology < INTERNAL MEDICINE, RHEUMATOLOGY                                                                                                                                                                                                                                                                                                                                                                                                                                                                                                                                                                                                                                                                                        |
|                               |                                                                                                                                                                                                                                                                                                                                                                                                                                                                                                                                                                                                                                                                                                                                                                       |

SCHOLARONE™  
Manuscripts

1  
2  
3 **A Phase 3, multicentre, randomised, double-blind, placebo-controlled, 104-week study of**  
4 **subcutaneous belimumab administered in combination with rituximab in adults with systemic lupus**  
5 **erythematosus (SLE): BLISS-BELIEVE study protocol**  
6  
7  
8  
9

10 **Authors:** Y.K. Onno Teng<sup>1</sup>, Ian N. Bruce<sup>2</sup>, Betty Diamond<sup>3</sup>, Richard A. Furie<sup>4</sup>, Ronald F. van Vollenhoven<sup>5</sup>,  
11 David Gordon<sup>6\*</sup>, James Groark<sup>7</sup>, Robert B. Henderson<sup>8</sup>, Mary Oldham<sup>8</sup>, Paul P. Tak<sup>8</sup>  
12  
13

14  
15 **Affiliations:**

16 <sup>1</sup>Department of Nephrology, Leiden University Medical Center, Leiden, The Netherlands

17  
18 <sup>2</sup>Arthritis Research UK Centre for Epidemiology, The University of Manchester and NIHR Manchester  
19 Biomedical Research Centre, Manchester University Hospitals NHS Foundation Trust, Manchester  
20 Academic Health Science Centre, Manchester, UK  
21

22  
23 <sup>3</sup>The Feinstein Institute for Medical Research, Manhasset, NY, USA

24  
25 <sup>4</sup>Division of Rheumatology, Northwell Health, Great Neck, NY

26  
27 <sup>5</sup>Amsterdam Rheumatology and Immunology Center, Amsterdam, The Netherlands

28  
29 <sup>6</sup>GlaxoSmithKline, Philadelphia, PA, USA

30  
31 <sup>7</sup>GlaxoSmithKline, Collegeville, PA, USA

32  
33 <sup>8</sup>GlaxoSmithKline, Stevenage, Hertfordshire, UK

34  
35 \*At the time of protocol development  
36

37 **Corresponding author:** James Groark

38 **Corresponding author's address:**

39  
40 GlaxoSmithKline,

41  
42 1250 S. Collegeville Rd,

43  
44 Mailstop UP-4400,

45  
46 Collegeville, PA 19426, USA

47  
48 E-mail: james.g.groark@gsk.com

49  
50 Tel: (215)435-1909  
51

52 **Word count:** 3331  
53

54 **Figures:** 1      **Tables:** 3  
55  
56  
57  
58  
59  
60

**ABSTRACT**

**Introduction:** Belimumab, an anti-B-lymphocyte-stimulator antibody, is approved for the treatment of active, autoantibody-positive systemic lupus erythematosus (SLE). Rituximab, a B-cell-depleting anti-CD20 antibody, remains in the SLE treatment armamentarium despite failed trials in lupus nephritis and extra-renal lupus. These biologics, which operate through complementary mechanisms, might result in an enhanced depletion of circulating and tissue-resident autoreactive B lymphocytes when administered together. Thus, belimumab and rituximab combination may be a highly effective treatment of SLE. This study aims to evaluate and compare the efficacy, safety and tolerability of subcutaneous (SC) belimumab and a single cycle of rituximab in patients with SLE with belimumab alone.

**Methods and analysis:** BLISS-BELIEVE is a 3-arm, randomised, double-blind, placebo-controlled, 104-week superiority study. Two hundred adults with SLE will be randomised 1:2:1 to Arm A, belimumab SC 200 mg/week for 52 weeks plus placebo at Weeks 4 and 6; Arm B, belimumab SC 200 mg/week for 52 weeks plus rituximab 1000 mg at Weeks 4 and 6; Arm C, belimumab SC 200 mg/week plus standard therapy for 104 weeks. The 52-week treatment period (Arms A and B) is followed by a 52-week observational phase. The primary efficacy endpoint is the proportion of patients with disease control (SLE Disease Activity Index (SLEDAI)-2K  $\leq 2$ , without immunosuppressants and with a prednisone-equivalent dose of  $\leq 5$  mg/day) at Week 52. Major secondary efficacy endpoints are the proportion of patients in clinical remission (defined as SLEDAI-2K = 0, without immunosuppressants and corticosteroids) at Week 64, and the proportion of patients with disease control at Week 104. Safety endpoints include the incidence of adverse events (AEs), serious AEs and AEs of special interest.

**Ethics and dissemination:** Within 6 months of the study's primary manuscript publication anonymised individual participant data and study documents can be requested for further research from [www.clinicalstudydatarequest.com](http://www.clinicalstudydatarequest.com).

**Trial registration number:** NCT03312907

**ARTICLE SUMMARY**

- This study builds on the experience of randomised controlled trials of the biologics belimumab and rituximab used as single agents, as well as pre-clinical findings, case studies and open-label trials of belimumab and rituximab combination treatment
- The unique sequence of treatment administration, and assessment of the clinically relevant outcomes of disease control and disease remission, are novel features of this study
- BLISS-BELIEVE is the first randomised trial to carry out observations for 52 weeks after stopping belimumab treatment, allowing for the assessment of true disease remission and its durability
- BLISS-BELIEVE randomises patients to a third treatment arm of belimumab plus standard-of-care therapy, to reflect current real-life practice
- The study is limited by a relatively small sample size, and thus has limited power to detect infrequent adverse events

## INTRODUCTION

Immune-mediated inflammatory diseases (IMIDs) share some common molecular pathways that lead to inflammation, which results from dysregulation of the normal immune response. Chronic inflammation in IMIDs is associated with progressive tissue damage as well as increased co-morbidity and mortality. Systemic lupus erythematosus (SLE) and Sjögren's syndrome are both prototypic antibody-dependent IMIDs.<sup>1</sup> SLE is a chronic multisystem inflammatory autoimmune disease associated with impaired health-related quality of life.<sup>2,3</sup> The ultimate goals of SLE treatment are disease remission, damage prevention (from both disease progression and prolonged use of medication) and normalisation of health-related quality of life.<sup>4,5</sup> These goals are difficult to achieve in most patients owing to limitations in the efficacy of, and long-term toxicity associated with, conventional treatments for SLE, such as corticosteroids and immunosuppressants.<sup>6,7</sup>

Patients with SLE have elevated levels of circulating B-lymphocyte stimulator (BLyS), a member of the tumour necrosis factor ligand superfamily that promotes B cell activation and differentiation.<sup>8-10</sup> Increased serum BLyS levels in patients with SLE are associated with disease activity, disease relapse and increased numbers of autoantibody-secreting plasma cells, linking BLyS to the pathogenesis of SLE.<sup>9,11</sup> Belimumab, a recombinant immunoglobulin G1 $\lambda$  human monoclonal antibody, binds to and antagonises the biological activity of soluble BLyS.<sup>12</sup> It has shown efficacy in patients with autoantibody-positive active SLE in multiple trials.<sup>13-16</sup> Belimumab-treated patients also experienced fewer disease flares, and showed a reduction in steroid use and long-term organ damage accrual compared with patients receiving standard of care (SoC).<sup>13-17</sup> While the efficacy of belimumab has been demonstrated in patients with SLE, a proportion of patients maintain a degree of disease activity despite belimumab treatment.<sup>13-16</sup> Therefore, additional effective and well-tolerated treatment options are required to further improve overall disease control.

Rituximab is a B-cell-depleting, anti-CD20 monoclonal antibody that showed promise in several open-label clinical studies,<sup>18-22</sup> but failed to demonstrate efficacy in two randomised trials in SLE and lupus nephritis.<sup>23,24</sup> In autoimmune diseases, rituximab treatment results in rapid and near complete depletion of circulating CD20+ B cells; however, relatively high numbers of B cells persist in tissues, such as bone marrow, kidneys, synovium and salivary glands.<sup>25-29</sup> In SLE, an increase in BLyS levels after rituximab treatment may contribute to survival and rebound of autoreactive B cells and subsequent disease

1  
2  
3 flares,<sup>30 31</sup> as demonstrated in several cohort studies.<sup>32-34</sup> Consistent with these observations, reduced  
4 maturation of autoreactive B cells during B-cell reconstitution was observed in mice treated with an  
5 agent that blocked B-cell activating factor.<sup>35</sup>  
6  
7  
8  
9

10 Combining belimumab with rituximab therefore has a strong immunological rationale, as the drugs  
11 operate through complementary and perhaps synergistic mechanisms.<sup>36</sup> Belimumab treatment results in  
12 the mobilisation of memory B cells from tissues despite an overall decrease in peripheral B cell levels.<sup>37</sup>  
13 This phenomenon will render tissue-resident B cells more susceptible to depletion by rituximab. In  
14 addition, blocking the effects of high serum BLyS levels might have favourable quantitative and  
15 qualitative effects on B-cell reconstitution after depletion.<sup>31</sup> Synergistic or additive effects of such a  
16 combination have indeed been demonstrated in pre-clinical studies in lupus-prone mice. Improved  
17 tissue B-cell subset depletion, a decrease in the levels of autoantibodies, reduced proteinuria and  
18 improved survival were observed with combination therapy compared with either treatment alone.<sup>38-40</sup>  
19  
20  
21  
22  
23  
24  
25  
26

27 This hypothesis is further supported by case reports in patients with SLE, lupus nephritis and Sjögren's  
28 syndrome,<sup>41-45</sup> and prompted the SynBioSe study, which showed significant clinical and immunological  
29 improvements from baseline in patients with refractory SLE who received rituximab and belimumab.<sup>46</sup>  
30 Several clinical trials are currently investigating belimumab and rituximab combination therapy in  
31 primary Sjögren's syndrome (NCT02631538), lupus nephritis (CALIBRATE; NCT02260934), and SLE (BEAT  
32 Lupus; ISRCTN47873003).  
33  
34  
35  
36  
37

38 We hypothesised that durable low disease activity might be achieved in patients with active SLE by re-  
39 setting the autoreactive humoral immune system. Therefore, we have designed the BLISS-BELIEVE study  
40 to examine whether combination treatment with belimumab and rituximab could induce a pre-defined  
41 state of disease control or disease remission, allowing the tapering of conventional SLE therapies. This  
42 study will employ a novel sequence of belimumab and rituximab combination therapy and investigate  
43 novel study endpoints, which could potentially shift the current paradigm of SLE treatment.  
44  
45  
46  
47  
48  
49

50 The objective of this study is to evaluate the efficacy, safety and tolerability of subcutaneous (SC)  
51 belimumab and a single cycle of rituximab administered in a combination regimen in adult patients with  
52 SLE compared with belimumab alone.  
53  
54  
55  
56  
57  
58  
59  
60

## METHODS AND ANALYSIS

### Study design

This is a Phase 3, multicentre, 3-arm, randomised, double-blind, placebo-controlled, 104-week superiority study (205646; NCT03312907). There will be a 52-week double-blind treatment period followed by a 52-week double-blind observational treatment-free follow-up period in Arms A and B (to Week 104) (**Figure 1**). The study began recruitment in March 2018, with an estimated final completion in June 2021.

### Study population

Detailed inclusion and exclusion criteria are listed in **Table 1**. Briefly, patients must be  $\geq 18$  years of age, with a clinical diagnosis of SLE according to the American College of Rheumatology criteria, and a SLE Disease Activity Index (SLEDAI)-2K score  $\geq 6$  at screening. Patients with severe lupus nephritis or severe active central nervous system lupus will be excluded. Informed consent will be obtained from patients prior to the initiation of any study procedures or study-specific data collection.

**Table 1: Patient inclusion and exclusion criteria**

| Inclusion criteria                                                                                                                                                                                                                                                       |
|--------------------------------------------------------------------------------------------------------------------------------------------------------------------------------------------------------------------------------------------------------------------------|
| $\geq 18$ years of age                                                                                                                                                                                                                                                   |
| Clinical diagnosis of SLE according to the ACR criteria                                                                                                                                                                                                                  |
| Minimum screening SLEDAI-2K score $\geq 6$                                                                                                                                                                                                                               |
| Unequivocally positive ANA and/or anti-dsDNA test results from two independent time points                                                                                                                                                                               |
| Stable SLE treatment regimen                                                                                                                                                                                                                                             |
| Female patients not pregnant, not breastfeeding, not of childbearing potential or follow contraceptive guidance                                                                                                                                                          |
| Exclusion criteria                                                                                                                                                                                                                                                       |
| Symptomatic herpes zoster within 3 months prior to screening                                                                                                                                                                                                             |
| Active or latent TB, confirmed by medical history and examination, chest X-rays, and TB testing: either a positive TST (defined as a skin induration $\geq 5$ mm at 48–72 hours, regardless of BCG or other vaccination history), or a positive QuantiFERON-TB Gold test |
| Allergies to humanised monoclonal antibodies                                                                                                                                                                                                                             |
| Clinically significant multiple or severe drug allergies and/or history of hypersensitivity to belimumab and/or rituximab                                                                                                                                                |
| Lymphoma, leukaemia, or any malignancy within the past 5 years                                                                                                                                                                                                           |
| ALT $> 2 \times$ ULN                                                                                                                                                                                                                                                     |
| Bilirubin $> 1.5 \times$ ULN                                                                                                                                                                                                                                             |



---

1  
2  
3 IgA < 10 mg/dL  
4 IgG < 250 mg/dL  
5 Neutrophils < 1.5 x 10<sup>9</sup>  
6 Unstable liver or biliary disease  
7 Severe heart failure  
8 QTc >450 msec or >480 msec in patients with bundle branch block  
9 History of a major organ transplant  
10 Clinical evidence of significant unstable or uncontrolled acute or chronic diseases not due to SLE  
11 Acute or chronic infection requiring management  
12 Severe lupus kidney disease  
13 Severe active central nervous system lupus  
14 Planned surgical procedure, laboratory abnormality, or condition that makes the patient  
15 unsuitable for the study  
16 Evidence of serious suicide risk  
17 History of an anaphylaxis reaction to parenteral administration of contrast agents, human/murine  
18 proteins, or monoclonal antibodies  
19 Live vaccine(s) within 1 month prior to screening  
20 Within 364 days of Day 1, received certain biologics (belimumab, rituximab, abatacept, a B-cell-  
21 targeted therapy, a biologic investigational agent other than B-cell-targeted therapy), or required  
22 3 or more courses of systemic corticosteroids  
23 Within 90 days of Day 1, received anti-TNF therapy, interleukin-1 receptor antagonist, intravenous  
24 immunoglobulin, high-dose prednisone or equivalent, or plasmapheresis  
25 Within 60 days of Day 1, received a non-biologic investigational agent, intravenous  
26 cyclophosphamide, a steroid injection  
27 Positive HIV antibody test  
28 Positive serology for hepatitis B or hepatitis C  
29 Current or history (within 364 days of Day 1) of drug/alcohol dependence  
30 Sensitivity to any of the study treatments or components  
31 Unable to administer belimumab by SC injection  
32  
33  
34  
35  
36  
37  
38  
39  
40

---

41  
42 ACR, American College of Rheumatology; ALT, alanine aminotransferase; ANA, anti-nuclear antibodies;  
43 BCG, Bacillus Calmette-Guerin; IgA, immunoglobulin A; HIV, human immunodeficiency virus; IgG,  
44 immunoglobulin G; SC, subcutaneous; QTc, corrected QT; SLE, systemic lupus erythematosus; SLEDAI-2K,  
45 SLE Disease Activity Index; TB, tuberculosis; TNF, tumour necrosis factor; TST, tuberculin skin test; ULN,  
46 upper limit of normal  
47  
48  
49  
50  
51  
52  
53  
54  
55  
56  
57  
58  
59  
60

## Randomisation

Patients will be randomised 1:2:1 to one of three treatment arms: belimumab plus placebo (Arm A, control), belimumab plus rituximab (Arm B, combination), or belimumab plus SoC (Arm C, reference). At randomisation, patients will be stratified by their screening SLEDAI-2K score ( $\leq 9$  vs  $\geq 10$ ), immunosuppressant use (immunosuppressant use vs no use), and corticosteroid dose (prednisone equivalent  $\leq 10$  mg/day vs  $>10$  mg/day). Randomisation, and the first dose of belimumab, should be completed within 35 days of the initiation of screening.

## Blinding

The study is double-blind with regards to whether participants are randomised to Arm A or Arm B. Randomisation to Arm C will not be blinded. To minimise bias given that Arm C is open-label, independent assessors blinded to treatment group will conduct the SLEDAI-2K assessments at selected visits for the primary and major secondary efficacy endpoints. Unblinded safety data will be reviewed regularly by an Independent Data Monitoring Committee.

## Study treatments

Patients randomised to Arm A (control) will receive belimumab SC 200 mg/week for 52 weeks with a cycle of intravenous (IV) placebo (rituximab matched; dose 1 at Week 4 and dose 2 at Week 6). Patients randomised to Arm B (combination) will receive belimumab SC 200 mg/week for 52 weeks with a cycle of rituximab IV (1000 mg doses given at Week 4 and Week 6). Patients randomised to Arm C (reference) will receive belimumab SC 200 mg/week plus SoC, including immunosuppressants, for 104 weeks. Patients in Arms A and B will be administered a pre-medication regimen 30 minutes before each placebo or rituximab infusion, consisting of methylprednisolone IV 100 mg or equivalent, an oral antihistamine, and acetaminophen or equivalent (**Table 2**).

**Table 2: Study treatment arms**

| Treatment                    | Arm A (control)                             | Arm B (combination)                   | Arm C (reference)                               |
|------------------------------|---------------------------------------------|---------------------------------------|-------------------------------------------------|
| Belimumab                    | Belimumab SC 200 mg/week for 52 weeks       | Belimumab SC 200 mg/week for 52 weeks | Belimumab SC 200 mg/week plus SoC for 104 weeks |
| Rituximab or matched placebo | One cycle of placebo IV (rituximab matched) | One cycle of rituximab IV 1000 mg at  | None                                            |

|                                                                       | at Week 4 and Week 6                                                                               | Week 4 and Week 6                                                                                  |                                            |
|-----------------------------------------------------------------------|----------------------------------------------------------------------------------------------------|----------------------------------------------------------------------------------------------------|--------------------------------------------|
| Pre-medication (30 minutes before each placebo or rituximab infusion) | Methylprednisolone IV 100 mg or equivalent, oral antihistamine, acetaminophen or equivalent        | Methylprednisolone IV 100 mg or equivalent, oral antihistamine, acetaminophen or equivalent        | None                                       |
| Post Week 52 therapy                                                  | Antimalarials, NSAIDs, and/or corticosteroids with a prednisone equivalent dose of $\leq 5$ mg/day | Antimalarials, NSAIDs, and/or corticosteroids with a prednisone equivalent dose of $\leq 5$ mg/day | Continue belimumab SC 200 mg/week plus SoC |

IV, intravenous; NSAIDs, non-steroidal anti-inflammatory drugs; SC, subcutaneous; SoC, standard-of-care

After completing Week 52, patients in Arms A and B will enter into the 52-week treatment-free (defined as no active treatment with belimumab and/or rituximab), observational phase of the study (Weeks 53 through 104). Patients in Arm C will continue to receive belimumab SC and stable immunosuppressants during this phase. In addition, treatment with antimalarials, non-steroidal anti-inflammatory drugs, and corticosteroids (prednisone equivalent  $\leq 5$  mg/day) is allowed in the observational phase in all three arms.

Patients considered treatment failures (patients in Arm A or B who fail to respond adequately to study treatment, who do not meet the corticosteroid taper rules or tolerate immunosuppressant withdrawal at Week 4, or who require additional therapy) will be encouraged to remain in the study to receive all safety and efficacy assessments through Week 104. During this time (Weeks 53–104), additional treatment may be given, if deemed of benefit by the investigator, to patients with responses that do not reach the predefined study criteria for disease control (as defined in the study endpoints), or subsequently experience increased disease activity. This treatment can include belimumab, corticosteroids, and/or immunosuppressants; additional treatment with rituximab will be permitted, but not encouraged.

### Concomitant medications

Patients randomised to Arms A and B who enter the study on immunosuppressants will discontinue immunosuppressants at or prior to the Week 4 visit. Patients in Arm C who enter the study on stable immunosuppressants may continue to receive them throughout the study. After the initial 12 weeks of

study treatment, a protocol-specified corticosteroid taper will be initiated for all three arms. Antimalarials and non-steroidal anti-inflammatory drugs may be used throughout the study for all treatment arms.

Other investigational agents (or co-enrolment into another study of a different investigational agent), anti-tumour necrosis factor therapy, other biologics with effects on the immune system, immunoglobulin IV, cyclophosphamide IV, and plasmapheresis are prohibited throughout the study.

### Study endpoints

The primary efficacy endpoint is the proportion of patients with disease control at Week 52, defined as a SLEDAI-2K score of  $\leq 2$ , achieved without immunosuppressants and with a prednisone equivalent dose of  $\leq 5$  mg/day. The major secondary efficacy endpoints are the proportion of patients in clinical remission at Week 64 (defined as a clinical SLEDAI-2K score of 0, allowing for serologies of anti-dsDNA and hypocomplementemia and achieved without immunosuppressants and corticosteroids), and the proportion of patients with disease control at Week 104 (defined as a SLEDAI-2K score of  $\leq 2$ , achieved without immunosuppressants and with a prednisone-equivalent dose of  $\leq 5$  mg/day). Safety endpoints include the incidence of adverse events (AEs), including serious AEs (SAEs) and AEs of special interest (AESI). The endpoints will be assessed using the measures listed in **Table 3**.

**Table 3: Study assessments**

|                                                                                                                                                                                                                                                                                                                                                                                                              |
|--------------------------------------------------------------------------------------------------------------------------------------------------------------------------------------------------------------------------------------------------------------------------------------------------------------------------------------------------------------------------------------------------------------|
| <b>Efficacy assessment</b>                                                                                                                                                                                                                                                                                                                                                                                   |
| SLEDAI-2K, a clinical index for measuring SLE disease activity in the previous 10 days, at screening/baseline and at Weeks 52, 64 and 104                                                                                                                                                                                                                                                                    |
| <b>Safety assessment</b>                                                                                                                                                                                                                                                                                                                                                                                     |
| Full physical examination, electrocardiogram, clinical safety laboratory assessments, neurological assessment, and suicidal risk monitoring (assessed via C-SSRS) at screening. Symptom-driven physical examination, vital signs, clinical safety laboratory assessments, neurological assessment, and suicidal risk monitoring at scheduled and unscheduled visits                                          |
| <b>Laboratory tests</b>                                                                                                                                                                                                                                                                                                                                                                                      |
| Anti-dsDNA/ANA, complement C3/C4, serum immunoglobulin (IgG, IgA, IgM), urine testing (urinalysis, spot urine protein), haematology and blood chemistry, pregnancy test: performed at screening and at each assessment visit. Autoantibody levels, including aCL, beta-2-glycoprotein, lupus anticoagulant, and extractable nuclear antigens, will be measured at Day 1 and Weeks 8, 26, 52, 60, 80, and 104 |
| <b>B-cell analyses</b>                                                                                                                                                                                                                                                                                                                                                                                       |

---

## Pharmacokinetics

---

aCL, anti-cardiolipin; ANA, anti-nuclear antibodies; C, complement; C-SSRS, Columbia-Suicide Severity Rating Scale; Ig, immunoglobulin; SLE, systemic lupus erythematosus; SLEDAI, SLE Disease Activity Index; SLE, systemic lupus erythematosus

## Sample size calculation

Approximately 400 patients will be screened, with a goal of randomising at least 200 patients (50% screen failure rate). A target of 50 patients will be randomised in Arms A and C, and 100 patients in Arm B. This sample size provides at least 95% power (for the comparison of Arm B to Arm A at Week 52) at a 5% level of significance, assuming the underlying response in the control arm is 10%, and the true population effect is  $\geq 25\%$  with treatment Arm B (assumed response rate of 35%). For the primary endpoint, patients who drop out from the study will be included in the analysis as non-responders; thus, the assumed responder rates for Arms A and B already account for the rate of patient dropout. However, to ensure adequate safety exposure in Arm B, the sample size may be increased up to 300 patients if the dropout rate reaches 10% at the scheduled time point for receiving both doses of placebo or rituximab.

Based on limited clinical data with therapies including both belimumab and rituximab, opinions from external experts, and the rarity of remission or disease control seen in published studies, a rate of 35% of patients in Arm B achieving a state of disease control is considered to be highly clinically significant in SLE care. A response rate of 10% at Week 52 was assumed for Arm A (control), based on historical data from three belimumab Phase 3 trials. Assuming a 10% control responder rate and 50 patients in Arm A and 100 patients in Arm B, the minimum detectable effect at  $p < 0.05$  is a 12% improvement (i.e., an observed improvement of 12% or more in Arm B would give a  $p < 0.05$ ). A sample size sensitivity analysis was conducted on the primary endpoint to investigate the impact on power if the assumed underlying control response rate deviates from 10% or the treatment difference deviates from 25%.

## Statistical analyses

Unless otherwise stated, all analyses will be performed on the intent-to-treat population. The key analyses will compare belimumab with or without a single cycle of rituximab (Arm A vs Arm B). Descriptive statistics will be used to compare the combination of belimumab with a single cycle of rituximab (Arm B) versus belimumab with SoC (Arm C). The primary and major secondary endpoints will

1  
2  
3 be compared using a logistic regression model. The independent variables will include treatment group,  
4 baseline SLEDAI-2K score ( $\leq 9$  vs  $\geq 10$ ), immunosuppressant use at baseline (immunosuppressant use vs  
5 no use), and baseline corticosteroid dose (prednisone equivalent  $\leq 10$  mg/day vs  $> 10$  mg/day). If any  
6 factor fails to converge it will be removed from the logistic model. If the model fails to converge (e.g.  
7 owing to a small number of responders), the endpoints will be analysed using a Fisher's exact test.  
8 Missing data are accounted for in the primary efficacy endpoint, as all patients will be classified as either  
9 a non-responder (including premature study discontinuation or treatment failure prior to Week 52) or  
10 responder. Sensitivity analyses will be used to explore the impact of missing data and treatment failure  
11 imputation. Descriptive statistics will be used to summarise AEs, SAEs, AESI, changes in laboratory  
12 parameters, and immunogenicity.  
13  
14  
15  
16  
17  
18  
19  
20  
21

### 22 **Ethical considerations**

23 This study will be conducted in accordance with consensus ethical principles derived from international  
24 guidelines, including the Declaration of Helsinki and Council for International Organisations of Medical  
25 Sciences International Ethical Guidelines, applicable International Conference on Harmonisation Good  
26 Clinical Practice Guidelines, and applicable laws and regulations. The protocol has been reviewed and  
27 approved by institutional review boards (IRB)/independent ethics committees (IEC). The sponsor will  
28 comply with country-specific regulatory requirements relating to safety reporting to the regulatory  
29 authority, IRB/IEC, and investigators. SAEs will be reported by the investigator to the sponsor  
30 immediately, and no later than within 24 hours. Written informed consent will be obtained from all  
31 patients, who will be assigned a unique identifier; all patient records and data transferred to the sponsor  
32 will contain the identifier only.  
33  
34  
35  
36  
37  
38  
39  
40  
41

### 42 **Dissemination**

43 Study information will be publicly available at [www.clinicaltrials.gov](http://www.clinicaltrials.gov), and the results of this trial (positive  
44 and negative) will be submitted for publication in relevant peer-reviewed publications and the key  
45 findings presented at national and international conferences. Within 6 months of the publication of the  
46 primary manuscript for this study, anonymised individual participant data, the annotated case report  
47 form, protocol, reporting and analysis plan, data set specifications, raw dataset, analysis-ready dataset,  
48 and clinical study report will be available for research proposals approved by an independent review  
49 committee. Proposals should be submitted to [www.clinicalstudydatarequest.com](http://www.clinicalstudydatarequest.com). A data access  
50  
51  
52  
53  
54  
55  
56  
57  
58  
59  
60

1  
2  
3 agreement will be required. This paper complies with the Standard Protocol Items: Recommendations  
4 for Interventional Trials (SPIRIT) recommendations for protocol reporting.<sup>47</sup>  
5  
6  
7

### 8 **Patient and public involvement**

9 Patients and/or public were not involved in the development of this study.  
10  
11  
12  
13  
14

## 15 **DISCUSSION**

16  
17  
18 This study aims to explore the potential for synergy and to demonstrate greater efficacy of combination  
19 treatment with belimumab and rituximab compared with belimumab monotherapy in achieving low  
20 disease activity, disease remission, or clinical quiescence in patients with SLE. Although to date,  
21 combination biologics have not been widely used in other diseases, we think there is a strong  
22 immunological rationale to study belimumab and rituximab combination therapy in the context of SLE.  
23 The residual disease activity that many patients with SLE experience despite current therapies, further  
24 justifies the exploration of this novel combination treatment. If this study confirms our hypothesis that  
25 combined belimumab and rituximab treatment has additional efficacy over standard belimumab care,  
26 then this may transform the current treatment paradigm, allowing patients with SLE to discontinue  
27 conventional, often toxic medications.  
28  
29  
30  
31  
32  
33  
34  
35  
36

37 The unique sequence of administering belimumab and rituximab (which we believe will enhance B cell  
38 depletion), the use of belimumab SC and a larger sample size, differentiate the BLISS-BELIEVE study from  
39 BEAT Lupus (ISRCTN47873003),<sup>48</sup> a similar belimumab and rituximab combination therapy, Phase 2 trial  
40 in SLE that is currently recruiting patients in the UK. The sequence of treatment administration also  
41 differs from that used in the CALIBRATE trial in lupus nephritis (NCT02260934).<sup>49</sup> In addition, BLISS-  
42 BELIEVE is one of the first trials of belimumab to carry out assessments for 52 weeks after stopping  
43 treatment, and investigate ambitious, clinically relevant outcomes of low disease activity or disease  
44 remission. The 52-week observational, treatment-free phase provides an opportunity to observe if a  
45 true disease remission occurs, and allows for the assessment of the durability of any such remission or  
46 low disease activity. In the treatment of SLE, it is important to balance clinical efficacy and therapy-  
47 related toxicity. The unique design of BLISS-BELIEVE will ensure this is assessed through the use of  
48  
49  
50  
51  
52  
53  
54  
55  
56  
57  
58  
59  
60

1  
2  
3 rigorous endpoints (such as clinical remission), and by enabling the termination of belimumab if toxicity  
4 is an issue.  
5  
6

7  
8 The unique treatment schedules were selected according to a rationale based on the current evidence.  
9  
10 In the 52-week treatment phase, belimumab SC 200 mg will be administered weekly as per the  
11 treatment regimen in the Phase 3 study of belimumab SC, which demonstrated its safety and efficacy in  
12 patients with SLE.<sup>15</sup> Rituximab is not approved for the treatment of patients with SLE, and no standard  
13 dosing regimen has been established. Based on previous trials of rituximab that showed a lack of  
14 efficacy, we deemed that a rituximab-only arm would fail to meet standards of equipoise. In the current  
15 study, rituximab dosing will follow one cycle of the approved dosing recommendation for rheumatoid  
16 arthritis, which is two doses of 1000 mg IV given 2 weeks apart. In a Phase 2/3 trial, this rituximab  
17 regimen demonstrated rapid depletion of CD19-positive cells (<5 cells/ $\mu$ L) in the majority of patients  
18 with SLE.<sup>23</sup> It is also the dosing regimen recommended in NHS England's Interim Clinical Commissioning  
19 Policy Statement for rituximab use in patients with refractory SLE.<sup>50</sup> Furthermore, belimumab and  
20 rituximab combination treatment has previously shown acceptable safety and significant clinical  
21 responses in patients with severe, refractory SLE.<sup>46</sup>  
22  
23  
24  
25  
26  
27  
28  
29  
30

31 Separating the administration of belimumab and rituximab may allow for observation of safety events  
32 attributable to each treatment; however, owing to the relatively small sample size, the study will have  
33 limited power to detect less common AEs. With the consecutive administration regimen, the study  
34 allows investigation of the hypothesis that belimumab mobilises additional CD20+ B cells into the  
35 circulation, making them available for anti-CD20 treatment with rituximab. Therefore, we will be able to  
36 further establish whether more efficient depletion of autoreactive B cells, otherwise protected from cell  
37 death in the tissue niches, is achieved.<sup>37</sup> We anticipate that there will be fewer autoreactive B cells  
38 appearing in the memory B-cell compartment during the early phase of B-cell reconstitution. However,  
39 we are aware that the controls for this analysis are historical, owing to the ethical considerations  
40 discussed above. B-cell mobilisation will be evaluated by comparing baseline, pre-belimumab B-cell  
41 levels with autoreactive B cells appearing in peripheral blood after belimumab treatment. The possible  
42 reappearance of autoreactive B cells following rituximab treatment will then be established by  
43 comparing B cells levels between the belimumab only and belimumab and rituximab arms.  
44  
45  
46  
47  
48  
49  
50  
51  
52  
53  
54  
55  
56  
57  
58  
59  
60



1  
2  
3 This study has some limitations. Because rituximab is not approved for the treatment of patients with  
4 SLE, a rituximab-only arm could not be included in the protocol. Therefore, clinical and serological  
5 outcomes attributable to rituximab treatment will not be assessed. However, this study aims to explore  
6 whether belimumab treatment can be optimised by sequential treatment with rituximab, for which a  
7 rituximab-only arm is not required. Another limitation of the study design is that direct measurements  
8 of B-cell depletion in tissue niches will not be performed. However, this measurement and a rituximab-  
9 only arm are being explored in a clinical trial of belimumab and rituximab combination therapy in  
10 primary Sjögren's syndrome (NCT02631538), which follows a similar administration regimen. Another  
11 limitation is that patients in Study Arms A and B will discontinue immunosuppressants, which might  
12 result in a higher than predicted dropout rate. Although substantially different from previous  
13 belimumab trials, such as BLISS 76, in which more than half the patients continued on background  
14 immunosuppressive agents,<sup>12</sup> this regimen will allow investigation of whether belimumab and rituximab  
15 combination therapy could result in an immunologically more favourable condition in some patients,  
16 thus enabling the tapering of conventional immunosuppressive drugs and possibly an  
17 immunosuppressant-free honeymoon. A positive outcome of BLISS-BELIEVE would further support the  
18 rationale to test this therapeutic strategy in Sjögren's syndrome and other autoantibody-dependent  
19 IMIDs.  
20  
21  
22  
23  
24  
25  
26  
27  
28  
29  
30  
31  
32

33 In conclusion, the BLISS-BELIEVE study is supported by strong scientific rationale from pre-clinical  
34 studies, case reports and open-label trials. Its pioneering and unique design will allow for a long-term  
35 observation of true clinical remission, assessment of the durability of such a remission state, and  
36 assessment of any potential safety issues. The results of this study may support the rationale for  
37 combination therapy in other autoimmune conditions. BLISS-BELIEVE began recruitment in March 2018,  
38 with estimated study completion in June 2021.  
39  
40  
41  
42  
43  
44  
45  
46

#### 47 **FUNDING:**

48 This study (205646; NCT03312907) is being conducted and funded by GSK. Medical writing assistance  
49 was provided by Gosia Carless, PhD, of Fishawack Indicia Ltd, UK, funded by GSK.  
50  
51  
52

#### 53 **CONTRIBUTORS:**

54  
55  
56  
57  
58  
59  
60

1  
2  
3 **PPT** initiated this study and has been involved in its design. **YKOT, INB, RAF, RFvV, DG, JG, RBH, MO,** and  
4 **PPT** were involved in the development of the study protocol, preparation of the manuscript and its  
5 subsequent revisions, and provided final approval of the version published. **BD** was involved in the  
6 preparation of the manuscript and its subsequent revisions, and provided final approval of the version  
7 published. All authors agree to be accountable for all aspects of the work in ensuring that questions  
8 related to the accuracy or integrity of any part of the work are appropriately investigated and resolved.  
9  
10  
11  
12

#### 13 14 15 **COMPETING INTERESTS:**

16 **YKOT's** work is funded by the Netherlands Scientific Organisation and the Dutch Kidney Foundation  
17 (KJPB12.028 & 17OKG04). **INB** is a National Institute for Health Research (NIHR) Senior Investigator and  
18 is funded by Arthritis Research UK and the NIHR Manchester Biomedical Research Centre; the views  
19 expressed in this publication are those of the author(s) and not necessarily those of the NHS, the NIHR  
20 or the Department of Health. **INB** has also received speaker's bureau and advisory board grants from  
21 UCB, has participated in advisory boards and steering committees for Astra Zeneca, is a member of  
22 Independent Data Safety Boards for Medimmune and Merck Serono, has received grants from Genzyme  
23 Sanofi, and has participated in advisory boards for Eli Lilly. **BD** is an investigator on the CALIBRATE study,  
24 which is sponsored by National Institute of Allergy and Infectious Diseases. **RAF** has received grants and  
25 is a consultant for GSK and Genentech/Roche. **RFvV** has received grants and is a consultant for AbbVie,  
26 BMS, GSK, Pfizer, and UCB, and is a consultant for Celgene, Biotest, Janssen, Lilly, and Novartis. **DG** was  
27 an employee of GSK at the time of protocol development, and holds shares in BMS. **JG, RBH, MO** (and  
28 her husband), and **PPT** are employees of GSK and hold shares in the company. **RBH** has a patent pending  
29 (patent number WO 2017050833 A1) related to this work.  
30  
31  
32  
33  
34  
35  
36  
37  
38  
39  
40

#### 41 42 **ETHICS APPROVAL:**

43 The protocol has been approved by IRB/IEC. Each study site has obtained relevant IRB/IEC approvals.  
44  
45  
46  
47  
48  
49  
50  
51  
52  
53  
54  
55  
56  
57  
58  
59  
60

## REFERENCES

1. Dorner T, Kinnman N, Tak PP. Targeting B cells in immune-mediated inflammatory disease: a comprehensive review of mechanisms of action and identification of biomarkers. *Pharmacol Ther* 2010;125(3):464-75.
2. D'Cruz DP, Khamashta MA, Hughes GRV. Systemic lupus erythematosus. *The Lancet* 2007;369(9561):587-96.
3. Lau CS, Mak A. The socioeconomic burden of SLE. *Nature Rev Rheumatol* 2009;5:400.
4. Wilhelm TR, Magder LS, Petri M. Remission in systemic lupus erythematosus: durable remission is rare. *Ann Rheum Dis* 2017;76(3):547-53.
5. van Vollenhoven RF, Mosca M, Bertias G, et al. Treat-to-target in systemic lupus erythematosus: recommendations from an international task force. *Ann Rheum Dis* 2014;73(6):958-67.
6. Gladman DD, Urowitz MB, Rahman P, et al. Accrual of organ damage over time in patients with systemic lupus erythematosus. *J Rheumatol* 2003;30(9):1955-59.
7. Oglesby A, Shaul AJ, Pokora T, et al. Adverse Event Burden, Resource Use, and Costs Associated with Immunosuppressant Medications for the Treatment of Systemic Lupus Erythematosus: A Systematic Literature Review. *Int J Rheumatol* 2013;2013:9.
8. Cheema GS, Roschke V, Hilbert DM, et al. Elevated serum B lymphocyte stimulator levels in patients with systemic immune-based rheumatic diseases. *Arthritis Rheum* 2001;44(6):1313-19.
9. Petri M, Stohl W, Chatham W, et al. Association of plasma B lymphocyte stimulator levels and disease activity in systemic lupus erythematosus. *Arthritis Rheum* 2008;58(8):2453-59.
10. Zhang J, Roschke V, Baker KP, et al. Cutting Edge: A Role for B Lymphocyte Stimulator in Systemic Lupus Erythematosus. *J Immunol* 2001;166(1):6-10.
11. Roth DA, Thompson A, Tang Y, et al. Elevated BLYS levels in patients with systemic lupus erythematosus: Associated factors and responses to belimumab. *Lupus* 2016;25(4):346-54.

- 1  
2  
3 12. Baker KP, Edwards BM, Main SH, et al. Generation and characterization of LymphoStat-B, a human  
4  
5 monoclonal antibody that antagonizes the bioactivities of B lymphocyte stimulator. *Arthritis*  
6  
7 *Rheum* 2003;48(11):3253-65.  
8  
9
- 10 13. Furie R, Petri M, Zamani O, et al. A phase III, randomized, placebo-controlled study of belimumab, a  
11  
12 monoclonal antibody that inhibits B lymphocyte stimulator, in patients with systemic lupus  
13  
14 erythematosus. *Arthritis Rheum* 2011;63(12):3918-30.  
15
- 16 14. Navarra SV, Guzmán RM, Gallacher AE, et al. Efficacy and safety of belimumab in patients with active  
17  
18 systemic lupus erythematosus: a randomised, placebo-controlled, phase 3 trial. *The Lancet*  
19  
20 2011;377(9767):721-31.  
21  
22
- 23 15. Stohl W, Schwarting A, Okada M, et al. Efficacy and Safety of Subcutaneous Belimumab in Systemic  
24  
25 Lupus Erythematosus: A Fifty-Two-Week Randomized, Double-Blind, Placebo-Controlled Study.  
26  
27 *Arthritis Rheumatol* 2017;69(5):1016-27.  
28  
29
- 30 16. Zhang F, Bae S-C, Bass D, et al. A pivotal phase III, randomised, placebo-controlled study of  
31  
32 belimumab in patients with systemic lupus erythematosus located in China, Japan and South  
33  
34 Korea. *Ann Rheum Dis* 2018  
35
- 36 17. Bruce IN, Urowitz M, van Vollenhoven R, et al. Long-term organ damage accrual and safety in  
37  
38 patients with SLE treated with belimumab plus standard of care. *Lupus* 2016;25(7):699-709.  
39  
40
- 41 18. Anolik JH, Barnard J, Cappione A, et al. Rituximab improves peripheral B cell abnormalities in human  
42  
43 systemic lupus erythematosus. *Arthritis Rheum* 2004;50(11):3580-90.  
44  
45
- 46 19. Cambridge G, Leandro MJ, Teodorescu M, et al. B cell depletion therapy in systemic lupus  
47  
48 erythematosus: effect on autoantibody and antimicrobial antibody profiles. *Arthritis Rheum*  
49  
50 2006;54(11):3612-22.  
51  
52  
53  
54  
55  
56  
57  
58  
59  
60

- 1  
2  
3 20. Leandro MJ, Cambridge G, Edwards JC, et al. B-cell depletion in the treatment of patients with  
4  
5 systemic lupus erythematosus: a longitudinal analysis of 24 patients. *Rheumatology (Oxford)*  
6  
7 2005;44(12):1542-5.  
8  
9  
10 21. Looney RJ, Anolik JH, Campbell D, et al. B cell depletion as a novel treatment for systemic lupus  
11  
12 erythematosus: A phase I/II dose-escalation trial of rituximab. *Arthritis Rheum* 2004;50(8):2580-  
13  
14 89.  
15  
16 22. Smith KGC, Jones RB, Burns SM, et al. Long-term comparison of rituximab treatment for refractory  
17  
18 systemic lupus erythematosus and vasculitis: Remission, relapse, and re-treatment. *Arthritis*  
19  
20 *Rheum* 2006;54(9):2970-82.  
21  
22  
23 23. Merrill JT, Neuwelt CM, Wallace DJ, et al. Efficacy and safety of rituximab in moderately-to-severely  
24  
25 active systemic lupus erythematosus: The randomized, double-blind, phase ii/iii systemic lupus  
26  
27 erythematosus evaluation of rituximab trial. *Arthritis Rheum* 2010;62(1):222-33.  
28  
29  
30 24. Rovin BH, Furie R, Latinis K, et al. Efficacy and safety of rituximab in patients with active proliferative  
31  
32 lupus nephritis: the Lupus Nephritis Assessment with Rituximab study. *Arthritis Rheum*  
33  
34 2012;64(4):1215-26.  
35  
36  
37 25. Pijpe J, Meijer JM, Bootsma H, et al. Clinical and histologic evidence of salivary gland restoration  
38  
39 supports the efficacy of rituximab treatment in Sjogren's syndrome. *Arthritis Rheum*  
40  
41 2009;60(11):3251-6.  
42  
43  
44 26. Rehnberg M, Amu S, Tarkowski A, et al. Short- and long-term effects of anti-CD20 treatment on B cell  
45  
46 ontogeny in bone marrow of patients with rheumatoid arthritis. *Arthritis Res Ther*  
47  
48 2009;11(4):R123.  
49  
50 27. Teng YK, Levarht EW, Hashemi M, et al. Immunohistochemical analysis as a means to predict  
51  
52 responsiveness to rituximab treatment. *Arthritis Rheum* 2007;56(12):3909-18.  
53  
54  
55  
56  
57  
58  
59  
60

- 1  
2  
3 28. Teng YKO, Levarht EWN, Toes REM, et al. Residual inflammation after rituximab treatment is  
4 associated with sustained synovial plasma cell infiltration and enhanced B cell repopulation. *Ann*  
5 *Rheum Dis* 2009;68(6):1011-16.  
6  
7  
8  
9  
10 29. Thurlings RM, Vos K, Wijbrandts CA, et al. Synovial tissue response to rituximab: mechanism of  
11 action and identification of biomarkers of response. *Ann Rheum Dis* 2008;67(7):917-25.  
12  
13  
14 30. Cambridge G, Isenberg DA, Edwards JC, et al. B cell depletion therapy in systemic lupus  
15 erythematosus: relationships among serum B lymphocyte stimulator levels, autoantibody profile  
16 and clinical response. *Ann Rheum Dis* 2008;67(7):1011-6.  
17  
18  
19  
20  
21 31. Carter LM, Isenberg DA, Ehrenstein MR. Elevated Serum BAFF Levels Are Associated With Rising  
22 Anti-Double-Stranded DNA Antibody Levels and Disease Flare Following B Cell Depletion  
23 Therapy in Systemic Lupus Erythematosus. *Arthritis Rheum* 2013;65(10):2672-79.  
24  
25  
26  
27  
28 32. Cambridge G, Stohl W, Leandro MJ, et al. Circulating levels of B lymphocyte stimulator in patients  
29 with rheumatoid arthritis following rituximab treatment: relationships with B cell depletion,  
30 circulating antibodies, and clinical relapse. *Arthritis Rheum* 2006;54(3):723-32.  
31  
32  
33  
34 33. Lavie F, Miceli-Richard C, Ittah M, et al. Increase of B cell-activating factor of the TNF family (BAFF)  
35 after rituximab treatment: insights into a new regulating system of BAFF production. *Ann Rheum*  
36 *Dis* 2007;66(5):700-3.  
37  
38  
39  
40  
41 34. Pollard RPE, Abdulahad WH, Vissink A, et al. Serum levels of BAFF, but not APRIL, are increased after  
42 rituximab treatment in patients with primary Sjögren's syndrome: data from a placebo-  
43 controlled clinical trial. *Ann Rheum Dis* 2013;72(1):146-48.  
44  
45  
46  
47  
48 35. Kawabata D, Venkatesh J, Ramanujam M, et al. Enhanced Selection of High Affinity DNA-Reactive B  
49 Cells Following Cyclophosphamide Treatment in Mice. *PLoS ONE* 2010;5(1):e8418.  
50  
51  
52 36. Ehrenstein MR, Wing C. The BAFFling effects of rituximab in lupus: danger ahead? *Nat Rev*  
53 *Rheumatol* 2016;12(6):367-72.  
54  
55  
56  
57  
58  
59  
60

- 1  
2  
3 37. Stohl W, Hiepe F, Latinis KM, et al. Belimumab reduces autoantibodies, normalizes low complement  
4 levels, and reduces select B cell populations in patients with systemic lupus erythematosus.  
5  
6  
7  
8 *Arthritis Rheum* 2012;64(7):2328-37.  
9
- 10 38. Bekar KW, Owen T, Dunn R, et al. Prolonged effects of short-term anti-CD20 B cell depletion therapy  
11 in murine systemic lupus erythematosus. *Arthritis Rheum* 2010;62(8):2443-57.  
12  
13
- 14 39. Gong Q, Ou Q, Ye S, et al. Importance of Cellular Microenvironment and Circulatory Dynamics in B  
15 Cell Immunotherapy. *J Immunol* 2005;174(2):817-26.  
16  
17
- 18 40. Lin W, Seshasayee D, Lee WP, et al. Dual B Cell Immunotherapy Is Superior to Individual Anti-CD20  
19 Depletion or BAFF Blockade in Murine Models of Spontaneous or Accelerated Lupus. *Arthritis*  
20  
21  
22  
23  
24  
25  
26  
27  
28  
29  
30  
31  
32  
33  
34  
35  
36  
37  
38  
39  
40  
41  
42  
43  
44  
45  
46  
47  
48  
49  
50  
51  
52  
53  
54  
55  
56  
57  
58  
59  
60
41. De Vita S, Quartuccio L, Salvin S, et al. Sequential therapy with belimumab followed by rituximab in  
Sjogren's syndrome associated with B-cell lymphoproliferation and overexpression of BAFF:  
evidence for long-term efficacy. *Clin Exp Rheumatol* 2014;32(4):490-4.
42. Gonzalez-Echavarri C, Ugarte A, Ruiz-Irastorza G. Rituximab-refractory lupus nephritis successfully  
treated with belimumab. *Clin Exp Rheumatol* 2016;34(2):355-6.
43. Gualtierotti R, Borghi MO, Gerosa M, et al. Successful sequential therapy with rituximab and  
belimumab in patients with active systemic lupus erythematosus: a case series. *Clin Exp*  
*Rheumatol* 2018
44. Kraaij T, Huizinga TWJ, Rabelink TJ, et al. Belimumab after rituximab as maintenance therapy in lupus  
nephritis. *Rheumatology* 2014;53(11):2122-24.
45. Simonetta F, Allali D, Roux-Lombard P, et al. Successful treatment of refractory lupus nephritis by the  
sequential use of rituximab and belimumab. *Joint Bone Spine* 2017;84(2):235-36.
46. Kraaij T KS, de Rooij ENM, Daele PLV, Bredewold OW, Bakker JA, Bajema I, Scherer HU, Toes REM,  
Huizinga TWJ, Rabelink T, van Kooten C, Teng YKO. Synergetic B-Cell Immunomodulation with

1  
2  
3 Rituximab and Belimumab Combination Treatment in Severe, Refractory SLE. *Arthritis*  
4  
5 *Rheumatol* 2017;69(suppl 10)  
6

7  
8 47. Chan A, Tetzlaff JM, Altman DG, et al. Spirit 2013 statement: Defining standard protocol items for  
9  
10 clinical trials. *Ann Intern Med* 2013;158(3):200-07.  
11

12 48. BEAT Lupus. <https://beatlupusuk/>  
13

14 49. CALIBRATE. <http://calibratestudy.org/about-calibrate#.Ww7HKbpFzDd>.  
15

16 50. NHS. Interim Clinical Commissioning Policy Statement: Rituximab for the treatment of Systemic  
17  
18 Lupus Erythematosus in adults. <https://www.england.nhs.uk/wp-content/uploads/2013/10/a13->  
19  
20 [ps-apdf 2013](https://www.england.nhs.uk/wp-content/uploads/2013/10/a13-ps-apdf-2013)  
21  
22  
23  
24  
25  
26  
27  
28  
29  
30  
31  
32  
33  
34  
35  
36  
37  
38  
39  
40  
41  
42  
43  
44  
45  
46  
47  
48  
49  
50  
51  
52  
53  
54  
55  
56  
57  
58  
59  
60



1  
2  
3  
4  
5  
6  
7  
8  
9  
10  
11  
12  
13  
14  
15  
16  
17  
18  
19  
20  
21  
22  
23  
24  
25  
26  
27  
28  
29  
30  
31  
32  
33  
34  
35  
36  
37  
38  
39  
40  
41  
42  
43  
44  
45  
46  
47  
48  
49  
50  
51  
52  
53  
54  
55  
56  
57  
58  
59  
60

**Figure 1: Study design**

IV, intravenous; PBO, placebo; RTX, rituximab; SC, subcutaneous; SoC, standard-of-care; W, week

For peer review only

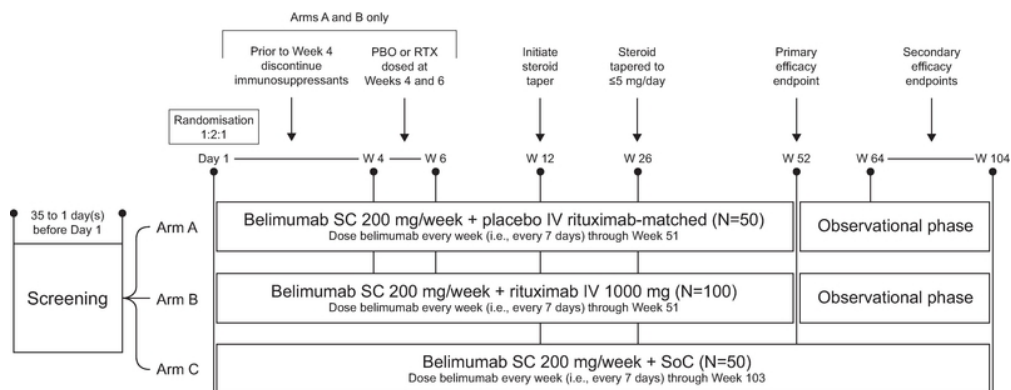

Study Design

IV, intravenous; PBO, placebo; RTX, rituximab; SC, subcutaneous; SoC, standard-of-care; W, week

67x25mm (300 x 300 DPI)

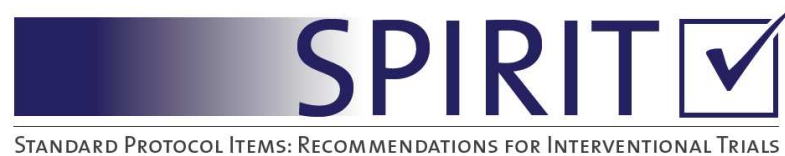

SPIRIT 2013 Checklist: Recommended items to address in a clinical trial protocol and related documents\*

| Section/item                      | Item No | Description                                                                                                                                                                                                                                                                              | Addressed on page number in the manuscript |
|-----------------------------------|---------|------------------------------------------------------------------------------------------------------------------------------------------------------------------------------------------------------------------------------------------------------------------------------------------|--------------------------------------------|
| <b>Administrative information</b> |         |                                                                                                                                                                                                                                                                                          |                                            |
| Title                             | 1       | Descriptive title identifying the study design, population, interventions, and, if applicable, trial acronym                                                                                                                                                                             | ___1___                                    |
| Trial registration                | 2a      | Trial identifier and registry name. If not yet registered, name of intended registry                                                                                                                                                                                                     | __2 and 6__                                |
|                                   | 2b      | All items from the World Health Organization Trial Registration Data Set                                                                                                                                                                                                                 | Yes (protocol p.1)                         |
| Protocol version                  | 3       | Date and version identifier                                                                                                                                                                                                                                                              | Yes (protocol p.1)                         |
| Funding                           | 4       | Sources and types of financial, material, and other support                                                                                                                                                                                                                              | ___15___                                   |
| Roles and responsibilities        | 5a      | Names, affiliations, and roles of protocol contributors                                                                                                                                                                                                                                  | __1 and 15__                               |
|                                   | 5b      | Name and contact information for the trial sponsor                                                                                                                                                                                                                                       | Yes (protocol p.1)                         |
|                                   | 5c      | Role of study sponsor and funders, if any, in study design; collection, management, analysis, and interpretation of data; writing of the report; and the decision to submit the report for publication, including whether they will have ultimate authority over any of these activities | __15–16__                                  |
|                                   | 5d      | Composition, roles, and responsibilities of the coordinating centre, steering committee, endpoint adjudication committee, data management team, and other individuals or groups overseeing the trial, if applicable (see Item 21a for data monitoring committee)                         | Yes (protocol p.99)                        |

1  
2  
3 **Introduction**

|   |                          |    |                                                                                                                                                                                                           |             |
|---|--------------------------|----|-----------------------------------------------------------------------------------------------------------------------------------------------------------------------------------------------------------|-------------|
| 4 | Background and rationale | 6a | Description of research question and justification for undertaking the trial, including summary of relevant studies (published and unpublished) examining benefits and harms for each intervention        | ___4–5___   |
| 5 |                          | 6b | Explanation for choice of comparators                                                                                                                                                                     | ___13–14___ |
| 6 | Objectives               | 7  | Specific objectives or hypotheses                                                                                                                                                                         | ___5___     |
| 7 | Trial design             | 8  | Description of trial design including type of trial (eg, parallel group, crossover, factorial, single group), allocation ratio, and framework (eg, superiority, equivalence, noninferiority, exploratory) | ___6___     |

8  
9  
10  
11  
12  
13  
14  
15 **Methods: Participants, interventions, and outcomes**

|    |                      |     |                                                                                                                                                                                                                                                                                                                                                                                |                                         |
|----|----------------------|-----|--------------------------------------------------------------------------------------------------------------------------------------------------------------------------------------------------------------------------------------------------------------------------------------------------------------------------------------------------------------------------------|-----------------------------------------|
| 16 | Study setting        | 9   | Description of study settings (eg, community clinic, academic hospital) and list of countries where data will be collected. Reference to where list of study sites can be obtained                                                                                                                                                                                             | Listed in the clinicaltrials.gov record |
| 17 | Eligibility criteria | 10  | Inclusion and exclusion criteria for participants. If applicable, eligibility criteria for study centres and individuals who will perform the interventions (eg, surgeons, psychotherapists)                                                                                                                                                                                   | ___6–7___                               |
| 18 | Interventions        | 11a | Interventions for each group with sufficient detail to allow replication, including how and when they will be administered                                                                                                                                                                                                                                                     | ___8–9___                               |
| 19 |                      | 11b | Criteria for discontinuing or modifying allocated interventions for a given trial participant (eg, drug dose change in response to harms, participant request, or improving/worsening disease)                                                                                                                                                                                 | ___9___                                 |
| 20 |                      | 11c | Strategies to improve adherence to intervention protocols, and any procedures for monitoring adherence (eg, drug tablet return, laboratory tests)                                                                                                                                                                                                                              | Yes (protocol p.58)                     |
| 21 |                      | 11d | Relevant concomitant care and interventions that are permitted or prohibited during the trial                                                                                                                                                                                                                                                                                  | ___9–10___                              |
| 22 | Outcomes             | 12  | Primary, secondary, and other outcomes, including the specific measurement variable (eg, systolic blood pressure), analysis metric (eg, change from baseline, final value, time to event), method of aggregation (eg, median, proportion), and time point for each outcome. Explanation of the clinical relevance of chosen efficacy and harm outcomes is strongly recommended | ___10–11___                             |

1  
2  
3  
4  
5  
6  
7  
8  
9  
10  
11  
12  
13  
14  
15  
16  
17  
18  
19  
20  
21  
22  
23  
24  
25  
26  
27  
28  
29  
30  
31  
32  
33  
34  
35  
36  
37  
38  
39  
40  
41  
42  
43  
44  
45  
46  
47

|                      |    |                                                                                                                                                                                       |                 |
|----------------------|----|---------------------------------------------------------------------------------------------------------------------------------------------------------------------------------------|-----------------|
| Participant timeline | 13 | Time schedule of enrolment, interventions (including any run-ins and washouts), assessments, and visits for participants. A schematic diagram is highly recommended (see Figure)      | _23 (Figure 1)_ |
| Sample size          | 14 | Estimated number of participants needed to achieve study objectives and how it was determined, including clinical and statistical assumptions supporting any sample size calculations | ___11___        |
| Recruitment          | 15 | Strategies for achieving adequate participant enrolment to reach target sample size                                                                                                   | ___N/A___       |

**Methods: Assignment of interventions (for controlled trials)**

Allocation:

|                                  |     |                                                                                                                                                                                                                                                                                                                                                          |                     |
|----------------------------------|-----|----------------------------------------------------------------------------------------------------------------------------------------------------------------------------------------------------------------------------------------------------------------------------------------------------------------------------------------------------------|---------------------|
| Sequence generation              | 16a | Method of generating the allocation sequence (eg, computer-generated random numbers), and list of any factors for stratification. To reduce predictability of a random sequence, details of any planned restriction (eg, blocking) should be provided in a separate document that is unavailable to those who enrol participants or assign interventions | Yes (protocol p.56) |
| Allocation concealment mechanism | 16b | Mechanism of implementing the allocation sequence (eg, central telephone; sequentially numbered, opaque, sealed envelopes), describing any steps to conceal the sequence until interventions are assigned                                                                                                                                                | Yes (protocol p.56) |
| Implementation                   | 16c | Who will generate the allocation sequence, who will enrol participants, and who will assign participants to interventions                                                                                                                                                                                                                                | Yes (protocol p.56) |
| Blinding (masking)               | 17a | Who will be blinded after assignment to interventions (eg, trial participants, care providers, outcome assessors, data analysts), and how                                                                                                                                                                                                                | Yes (protocol p.56) |
|                                  | 17b | If blinded, circumstances under which unblinding is permissible, and procedure for revealing a participant's allocated intervention during the trial                                                                                                                                                                                                     | Yes (protocol p.57) |

**Methods: Data collection, management, and analysis**

|                         |     |                                                                                                                                                                                                                                                                                                                                                                                                              |                      |
|-------------------------|-----|--------------------------------------------------------------------------------------------------------------------------------------------------------------------------------------------------------------------------------------------------------------------------------------------------------------------------------------------------------------------------------------------------------------|----------------------|
| Data collection methods | 18a | Plans for assessment and collection of outcome, baseline, and other trial data, including any related processes to promote data quality (eg, duplicate measurements, training of assessors) and a description of study instruments (eg, questionnaires, laboratory tests) along with their reliability and validity, if known. Reference to where data collection forms can be found, if not in the protocol | Yes (protocol p.100) |
|-------------------------|-----|--------------------------------------------------------------------------------------------------------------------------------------------------------------------------------------------------------------------------------------------------------------------------------------------------------------------------------------------------------------------------------------------------------------|----------------------|

|    |                                 |     |                                                                                                                                                                                                                                                                                                                                       |
|----|---------------------------------|-----|---------------------------------------------------------------------------------------------------------------------------------------------------------------------------------------------------------------------------------------------------------------------------------------------------------------------------------------|
| 1  |                                 |     |                                                                                                                                                                                                                                                                                                                                       |
| 2  |                                 |     |                                                                                                                                                                                                                                                                                                                                       |
| 3  |                                 | 18b | Plans to promote participant retention and complete follow-up, including list of any outcome data to be collected for participants who discontinue or deviate from intervention protocols                                                                                                                                             |
| 4  |                                 |     | _____7_____                                                                                                                                                                                                                                                                                                                           |
| 5  | Data management                 | 19  | Plans for data entry, coding, security, and storage, including any related processes to promote data quality (eg, double data entry; range checks for data values). Reference to where details of data management procedures can be found, if not in the protocol                                                                     |
| 6  |                                 |     | Yes (protocol p.100)                                                                                                                                                                                                                                                                                                                  |
| 7  |                                 |     |                                                                                                                                                                                                                                                                                                                                       |
| 8  |                                 |     |                                                                                                                                                                                                                                                                                                                                       |
| 9  |                                 |     |                                                                                                                                                                                                                                                                                                                                       |
| 10 | Statistical methods             | 20a | Statistical methods for analysing primary and secondary outcomes. Reference to where other details of the statistical analysis plan can be found, if not in the protocol                                                                                                                                                              |
| 11 |                                 |     | _____9_____                                                                                                                                                                                                                                                                                                                           |
| 12 |                                 |     |                                                                                                                                                                                                                                                                                                                                       |
| 13 |                                 | 20b | Methods for any additional analyses (eg, subgroup and adjusted analyses)                                                                                                                                                                                                                                                              |
| 14 |                                 |     | _____N/A_____                                                                                                                                                                                                                                                                                                                         |
| 15 |                                 | 20c | Definition of analysis population relating to protocol non-adherence (eg, as randomised analysis), and any statistical methods to handle missing data (eg, multiple imputation)                                                                                                                                                       |
| 16 |                                 |     | _____9_____                                                                                                                                                                                                                                                                                                                           |
| 17 |                                 |     |                                                                                                                                                                                                                                                                                                                                       |
| 18 | <b>Methods: Monitoring</b>      |     |                                                                                                                                                                                                                                                                                                                                       |
| 19 |                                 |     |                                                                                                                                                                                                                                                                                                                                       |
| 20 | Data monitoring                 | 21a | Composition of data monitoring committee (DMC); summary of its role and reporting structure; statement of whether it is independent from the sponsor and competing interests; and reference to where further details about its charter can be found, if not in the protocol. Alternatively, an explanation of why a DMC is not needed |
| 21 |                                 |     | Yes (protocol p.99)                                                                                                                                                                                                                                                                                                                   |
| 22 |                                 |     |                                                                                                                                                                                                                                                                                                                                       |
| 23 |                                 |     |                                                                                                                                                                                                                                                                                                                                       |
| 24 |                                 |     |                                                                                                                                                                                                                                                                                                                                       |
| 25 |                                 | 21b | Description of any interim analyses and stopping guidelines, including who will have access to these interim results and make the final decision to terminate the trial                                                                                                                                                               |
| 26 |                                 |     | Yes (protocol p.88)                                                                                                                                                                                                                                                                                                                   |
| 27 |                                 |     |                                                                                                                                                                                                                                                                                                                                       |
| 28 | Harms                           | 22  | Plans for collecting, assessing, reporting, and managing solicited and spontaneously reported adverse events and other unintended effects of trial interventions or trial conduct                                                                                                                                                     |
| 29 |                                 |     | _____9–10_____                                                                                                                                                                                                                                                                                                                        |
| 30 |                                 |     |                                                                                                                                                                                                                                                                                                                                       |
| 31 | Auditing                        | 23  | Frequency and procedures for auditing trial conduct, if any, and whether the process will be independent from investigators and the sponsor                                                                                                                                                                                           |
| 32 |                                 |     | Yes (protocol p.88)                                                                                                                                                                                                                                                                                                                   |
| 33 |                                 |     |                                                                                                                                                                                                                                                                                                                                       |
| 34 |                                 |     |                                                                                                                                                                                                                                                                                                                                       |
| 35 | <b>Ethics and dissemination</b> |     |                                                                                                                                                                                                                                                                                                                                       |
| 36 |                                 |     |                                                                                                                                                                                                                                                                                                                                       |
| 37 | Research ethics approval        | 24  | Plans for seeking research ethics committee/institutional review board (REC/IRB) approval                                                                                                                                                                                                                                             |
| 38 |                                 |     | _____9_____                                                                                                                                                                                                                                                                                                                           |
| 39 |                                 |     |                                                                                                                                                                                                                                                                                                                                       |
| 40 |                                 |     |                                                                                                                                                                                                                                                                                                                                       |
| 41 |                                 |     |                                                                                                                                                                                                                                                                                                                                       |
| 42 |                                 |     |                                                                                                                                                                                                                                                                                                                                       |
| 43 |                                 |     |                                                                                                                                                                                                                                                                                                                                       |
| 44 |                                 |     |                                                                                                                                                                                                                                                                                                                                       |
| 45 |                                 |     |                                                                                                                                                                                                                                                                                                                                       |
| 46 |                                 |     |                                                                                                                                                                                                                                                                                                                                       |
| 47 |                                 |     |                                                                                                                                                                                                                                                                                                                                       |

|    |                      |     |                                                                                                                 |                     |
|----|----------------------|-----|-----------------------------------------------------------------------------------------------------------------|---------------------|
| 1  |                      |     |                                                                                                                 |                     |
| 2  |                      |     |                                                                                                                 |                     |
| 3  | Protocol             | 25  | Plans for communicating important protocol modifications (eg, changes to eligibility criteria, outcomes,        | Yes (protocol p.98) |
| 4  | amendments           |     | analyses) to relevant parties (eg, investigators, REC/IRBs, trial participants, trial registries, journals,     |                     |
| 5  |                      |     | regulators)                                                                                                     |                     |
| 6  |                      |     |                                                                                                                 |                     |
| 7  | Consent or assent    | 26a | Who will obtain informed consent or assent from potential trial participants or authorised surrogates, and      | Yes (protocol p.98) |
| 8  |                      |     | how (see Item 32)                                                                                               |                     |
| 9  |                      |     |                                                                                                                 |                     |
| 10 |                      | 26b | Additional consent provisions for collection and use of participant data and biological specimens in ancillary  | ___ n/a ___         |
| 11 |                      |     | studies, if applicable                                                                                          |                     |
| 12 |                      |     |                                                                                                                 |                     |
| 13 | Confidentiality      | 27  | How personal information about potential and enrolled participants will be collected, shared, and maintained    | ___ 9–10 ___        |
| 14 |                      |     | in order to protect confidentiality before, during, and after the trial                                         |                     |
| 15 |                      |     |                                                                                                                 |                     |
| 16 | Declaration of       | 28  | Financial and other competing interests for principal investigators for the overall trial and each study site   | ___ 13 ___          |
| 17 | interests            |     |                                                                                                                 |                     |
| 18 |                      |     |                                                                                                                 |                     |
| 19 | Access to data       | 29  | Statement of who will have access to the final trial dataset, and disclosure of contractual agreements that     | Yes (protocol p.88) |
| 20 |                      |     | limit such access for investigators                                                                             |                     |
| 21 |                      |     |                                                                                                                 |                     |
| 22 | Ancillary and post-  | 30  | Provisions, if any, for ancillary and post-trial care, and for compensation to those who suffer harm from trial | ___ N/A ___         |
| 23 | trial care           |     | participation                                                                                                   |                     |
| 24 |                      |     |                                                                                                                 |                     |
| 25 | Dissemination policy | 31a | Plans for investigators and sponsor to communicate trial results to participants, healthcare professionals,     | ___ 10 ___          |
| 26 |                      |     | the public, and other relevant groups (eg, via publication, reporting in results databases, or other data       |                     |
| 27 |                      |     | sharing arrangements), including any publication restrictions                                                   |                     |
| 28 |                      |     |                                                                                                                 |                     |
| 29 |                      | 31b | Authorship eligibility guidelines and any intended use of professional writers                                  | ___ 13 ___          |
| 30 |                      |     |                                                                                                                 |                     |
| 31 |                      | 31c | Plans, if any, for granting public access to the full protocol, participant-level dataset, and statistical code | ___ 10 ___          |
| 32 |                      |     |                                                                                                                 |                     |
| 33 | <b>Appendices</b>    |     |                                                                                                                 |                     |
| 34 |                      |     |                                                                                                                 |                     |
| 35 | Informed consent     | 32  | Model consent form and other related documentation given to participants and authorised surrogates              | ___ No ___          |
| 36 | materials            |     |                                                                                                                 |                     |
| 37 |                      |     |                                                                                                                 |                     |
| 38 | Biological           | 33  | Plans for collection, laboratory evaluation, and storage of biological specimens for genetic or molecular       | Yes (protocol)      |
| 39 | specimens            |     | analysis in the current trial and for future use in ancillary studies, if applicable                            |                     |
| 40 |                      |     |                                                                                                                 |                     |

41

42

43

44

45

46

47

1  
2 \*It is strongly recommended that this checklist be read in conjunction with the SPIRIT 2013 Explanation & Elaboration for important clarification on the items.  
3 Amendments to the protocol should be tracked and dated. The SPIRIT checklist is copyrighted by the SPIRIT Group under the Creative Commons  
4 "[Attribution-NonCommercial-NoDerivs 3.0 Unported](#)" license.  
5  
6  
7  
8  
9  
10  
11  
12  
13  
14  
15  
16  
17  
18  
19  
20  
21  
22  
23  
24  
25  
26  
27  
28  
29  
30  
31  
32  
33  
34  
35  
36  
37  
38  
39  
40  
41  
42  
43  
44  
45  
46  
47

For peer review only



# BMJ Open

## A Phase 3, multicentre, randomised, double-blind, placebo-controlled, 104-week study of subcutaneous belimumab administered in combination with rituximab in adults with systemic lupus erythematosus (SLE): BLISS-BELIEVE study protocol

|                                 |                                                                                                                                                                                                                                                                                                                                                                                                                                                                                                                                                                                                                                                                                                                                                                       |
|---------------------------------|-----------------------------------------------------------------------------------------------------------------------------------------------------------------------------------------------------------------------------------------------------------------------------------------------------------------------------------------------------------------------------------------------------------------------------------------------------------------------------------------------------------------------------------------------------------------------------------------------------------------------------------------------------------------------------------------------------------------------------------------------------------------------|
| Journal:                        | <i>BMJ Open</i>                                                                                                                                                                                                                                                                                                                                                                                                                                                                                                                                                                                                                                                                                                                                                       |
| Manuscript ID                   | bmjopen-2018-025687.R1                                                                                                                                                                                                                                                                                                                                                                                                                                                                                                                                                                                                                                                                                                                                                |
| Article Type:                   | Protocol                                                                                                                                                                                                                                                                                                                                                                                                                                                                                                                                                                                                                                                                                                                                                              |
| Date Submitted by the Author:   | 21-Nov-2018                                                                                                                                                                                                                                                                                                                                                                                                                                                                                                                                                                                                                                                                                                                                                           |
| Complete List of Authors:       | Teng, Y.K Onno; Leiden University Medical Center, Department of Nephrology<br>Bruce, Ian; Arthritis Research UK Centre for Epidemiology, The University of Manchester and NIHR Manchester Biomedical Research Centre, Manchester University Hospitals NHS Foundation Trust, Manchester Academic Health Science Centre<br>Diamond, Betty; Feinstein Institute for Medical Research, Autoimmune, Musculoskeletal and Hematopoietic Diseases<br>Furie, Richard; Division of Rheumatology, Northwell Health<br>van Vollenhoven, Ronald; ARC, Rheumatology<br>Gordon, David; GlaxoSmithKline*, At the time of protocol development<br>Groark, James; GlaxoSmithKline,<br>Henderson, Robert; GlaxoSmithKline<br>Oldham, Mary; GlaxoSmithKline<br>Tak, Paul; GlaxoSmithKline |
| <b>Primary Subject Heading</b>: | Rheumatology                                                                                                                                                                                                                                                                                                                                                                                                                                                                                                                                                                                                                                                                                                                                                          |
| Secondary Subject Heading:      | Pharmacology and therapeutics                                                                                                                                                                                                                                                                                                                                                                                                                                                                                                                                                                                                                                                                                                                                         |
| Keywords:                       | Clinical trials < THERAPEUTICS, Rheumatology < INTERNAL MEDICINE, RHEUMATOLOGY                                                                                                                                                                                                                                                                                                                                                                                                                                                                                                                                                                                                                                                                                        |
|                                 |                                                                                                                                                                                                                                                                                                                                                                                                                                                                                                                                                                                                                                                                                                                                                                       |

SCHOLARONE™  
Manuscripts

1  
2  
3 **A Phase 3, multicentre, randomised, double-blind, placebo-controlled, 104-week study of**  
4 **subcutaneous belimumab administered in combination with rituximab in adults with systemic**  
5 **lupus erythematosus (SLE): BLISS-BELIEVE study protocol**  
6  
7  
8  
9

10 **Authors:** Y.K. Onno Teng<sup>1</sup>, Ian N. Bruce<sup>2</sup>, Betty Diamond<sup>3</sup>, Richard A. Furie<sup>4</sup>, Ronald F. van  
11 Vollenhoven<sup>5</sup>, David Gordon<sup>6\*</sup>, James Groark<sup>7</sup>, Robert B. Henderson<sup>8</sup>, Mary Oldham<sup>8</sup>, Paul P. Tak<sup>8</sup>  
12  
13

14  
15 **Affiliations:**

16 <sup>1</sup>Department of Nephrology, Leiden University Medical Center, Leiden, The Netherlands

17 <sup>2</sup>Arthritis Research UK Centre for Epidemiology, The University of Manchester and NIHR Manchester  
18 Biomedical Research Centre, Manchester University Hospitals NHS Foundation Trust, Manchester  
19 Academic Health Science Centre, Manchester, UK  
20

21 <sup>3</sup>The Feinstein Institute for Medical Research, Manhasset, NY, USA

22 <sup>4</sup>Division of Rheumatology, Northwell Health, Great Neck, NY

23 <sup>5</sup>Amsterdam Rheumatology and Immunology Center, Amsterdam, The Netherlands

24 <sup>6</sup>GlaxoSmithKline, Philadelphia, PA, USA

25 <sup>7</sup>GlaxoSmithKline, Collegeville, PA, USA

26 <sup>8</sup>GlaxoSmithKline, Stevenage, Hertfordshire, UK

27 \*At the time of protocol development  
28  
29  
30  
31  
32  
33  
34  
35  
36

37 **Corresponding author:** James Groark

38 **Corresponding author's address:** james.g.groark@gsk.com  
39  
40  
41

42 **Target Journal:** [BMJ Open](#) (IF 2.369)

- 43 • Word count: 3356 (limit 4000)
- 44 • Figures: 1, Tables: 3
- 45 • Supplementary material: No
- 46 • Adhering to the SPIRIT guidelines is recommended and the SPIRIT checklist should be  
47 uploaded as part of the submission  
48  
49  
50  
51  
52  
53  
54  
55  
56  
57  
58  
59  
60

1  
2  
3 **Abstract** (word count: 298; limit: 300)  
4  
5

6 **Introduction:** Belimumab, an anti-B-lymphocyte-stimulator antibody, is approved for the treatment  
7 of active, autoantibody-positive systemic lupus erythematosus (SLE). Rituximab, a B-cell-depleting  
8 anti-CD20 antibody, remains in the SLE treatment armamentarium despite failed trials in lupus  
9 nephritis and extra-renal lupus. These biologics, which operate through complementary  
10 mechanisms, might result in an enhanced depletion of circulating and tissue-resident autoreactive B  
11 lymphocytes when administered together. Thus, belimumab and rituximab combination may be a  
12 highly effective treatment of SLE. This study aims to evaluate and compare the efficacy, safety and  
13 tolerability of subcutaneous (SC) belimumab and a single cycle of rituximab in patients with SLE with  
14 belimumab alone.  
15  
16  
17  
18  
19  
20  
21  
22

23 **Methods and analysis:** BLISS-BELIEVE is a 3-arm, randomised, double-blind, placebo-controlled, 104-  
24 week superiority study. Two hundred adults with SLE will be randomised 1:2:1 to Arm A, belimumab  
25 SC 200 mg/week for 52 weeks plus placebo at Weeks 4 and 6; Arm B, belimumab SC 200 mg/week  
26 for 52 weeks plus rituximab 1000 mg at Weeks 4 and 6; Arm C, belimumab SC 200 mg/week plus  
27 standard therapy for 104 weeks. The 52-week treatment period (Arms A and B) is followed by a 52-  
28 week observational phase. The primary efficacy endpoint is the proportion of patients with disease  
29 control (SLE Disease Activity Index (SLEDAI)-2K  $\leq 2$ , without immunosuppressants and with a  
30 prednisone-equivalent dose of  $\leq 5$  mg/day) at Week 52. Major secondary efficacy endpoints are the  
31 proportion of patients in clinical remission (defined as SLEDAI-2K = 0, without immunosuppressants  
32 and corticosteroids) at Week 64, and the proportion of patients with disease control at Week 104.  
33 Safety endpoints include the incidence of adverse events (AEs), serious AEs and AEs of special  
34 interest.  
35  
36  
37  
38  
39  
40  
41  
42  
43  
44

45 **Ethics and dissemination:** Within 6 months of the study's primary manuscript publication  
46 anonymised individual participant data and study documents can be requested for further research  
47 from [www.clinicalstudydatarequest.com](http://www.clinicalstudydatarequest.com).  
48  
49  
50

51 **Trial registration number:** NCT03312907  
52  
53  
54  
55  
56  
57  
58  
59  
60

**Article summary (Strengths and limitations of this study)**

- This study builds on the experience of randomised controlled trials of the biologics belimumab and rituximab used as single agents, as well as pre-clinical findings, case studies and open-label trials of belimumab and rituximab combination treatment
- The unique sequence of treatment administration, and assessment of the clinically relevant outcomes of disease control and disease remission, are novel features of this study
- BLISS-BELIEVE is the first randomised trial to carry out observations for 52 weeks after stopping belimumab treatment, allowing for the assessment of true disease remission and its durability
- BLISS-BELIEVE randomises patients to a third treatment arm of belimumab plus standard-of-care therapy, to reflect current real-life practice
- The study is limited by a relatively small sample size, and thus has limited power to detect infrequent adverse events

## Introduction

Immune-mediated inflammatory diseases (IMIDs) share some common molecular pathways that lead to inflammation, which results from dysregulation of the normal immune response. Chronic inflammation in IMIDs is associated with progressive tissue damage as well as increased co-morbidity and mortality. Systemic lupus erythematosus (SLE) and Sjögren's syndrome are both prototypic antibody-dependent IMIDs.<sup>1</sup> SLE is a chronic multisystem inflammatory autoimmune disease associated with impaired health-related quality of life.<sup>2,3</sup> The ultimate goals of SLE treatment are disease remission, damage prevention (from both disease progression and prolonged use of medication) and normalisation of health-related quality of life.<sup>4,5</sup> These goals are difficult to achieve in most patients owing to limitations in the efficacy of, and long-term toxicity associated with, conventional treatments for SLE, such as corticosteroids and immunosuppressants.<sup>6,7</sup>

Patients with SLE have elevated levels of circulating B-lymphocyte stimulator (BLyS), a member of the tumour necrosis factor ligand superfamily that promotes B cell activation and differentiation.<sup>8-10</sup> Increased serum BLyS levels in patients with SLE are associated with disease activity, disease relapse and increased numbers of autoantibody-secreting plasma cells, linking BLyS to the pathogenesis of SLE.<sup>9,11</sup> Belimumab, a recombinant immunoglobulin G1 $\lambda$  human monoclonal antibody, binds to and antagonises the biological activity of soluble BLyS.<sup>12</sup> It has shown efficacy in patients with autoantibody-positive active SLE in multiple trials.<sup>13-16</sup> Belimumab-treated patients also experienced fewer disease flares, and showed a reduction in steroid use and long-term organ damage accrual compared with patients receiving standard of care (SoC).<sup>13-17</sup> While the efficacy of belimumab has been demonstrated in patients with SLE, a proportion of patients maintain a degree of disease activity despite belimumab treatment.<sup>13-16</sup> Therefore, additional effective and well-tolerated treatment options are required to further improve overall disease control.

Rituximab is a B-cell-depleting, anti-CD20 monoclonal antibody that showed promise in several open-label clinical studies,<sup>18-22</sup> but failed to demonstrate efficacy in two randomised trials in SLE and lupus nephritis.<sup>23,24</sup> In autoimmune diseases, rituximab treatment results in rapid and near complete depletion of circulating CD20+ B cells; however, relatively high numbers of B cells persist in tissues, such as bone marrow, kidneys, synovium and salivary glands.<sup>25-29</sup> In SLE, an increase in BLyS levels after rituximab treatment may contribute to survival and rebound of autoreactive B cells and subsequent disease flares,<sup>30,31</sup> as demonstrated in several cohort studies.<sup>32-34</sup> Consistent with these

1  
2  
3 observations, reduced maturation of autoreactive B cells during B-cell reconstitution was observed  
4 in mice treated with an agent that blocked B-cell activating factor.<sup>35</sup>  
5  
6  
7

8 Combining belimumab with rituximab therefore has a strong immunological rationale, as the drugs  
9 operate through complementary and perhaps synergistic mechanisms.<sup>36</sup> Belimumab treatment  
10 results in the mobilisation of memory B cells from tissues despite an overall decrease in peripheral B  
11 cell levels.<sup>37</sup> This phenomenon will render tissue-resident B cells more susceptible to depletion by  
12 rituximab. In addition, blocking the effects of high serum BLYS levels might have favourable  
13 quantitative and qualitative effects on B-cell reconstitution after depletion.<sup>31</sup> Synergistic or additive  
14 effects of such a combination have indeed been demonstrated in pre-clinical studies in lupus-prone  
15 mice. Improved tissue B-cell subset depletion, a decrease in the levels of autoantibodies, reduced  
16 proteinuria and improved survival were observed with combination therapy compared with either  
17 treatment alone.<sup>38-40</sup>  
18  
19  
20  
21  
22  
23  
24  
25

26 This hypothesis is further supported by case reports in patients with SLE, lupus nephritis and  
27 Sjögren's syndrome,<sup>41-45</sup> and prompted the SynBioSe study, which showed significant clinical and  
28 immunological improvements from baseline in patients with refractory SLE who received rituximab  
29 and belimumab.<sup>46</sup> Several clinical trials are currently investigating belimumab and rituximab  
30 combination therapy in primary Sjögren's syndrome (NCT02631538), lupus nephritis (CALIBRATE;  
31 NCT02260934), and SLE (BEAT Lupus; ISRCTN47873003).  
32  
33  
34  
35  
36  
37

38 We hypothesised that durable low disease activity might be achieved in patients with active SLE by  
39 re-setting the autoreactive humoral immune system. Therefore, we have designed the BLISS-BELIEVE  
40 study to examine whether combination treatment with belimumab and rituximab could induce a  
41 pre-defined state of disease control or disease remission, allowing the tapering of conventional SLE  
42 therapies. This study will employ a novel sequence of belimumab and rituximab combination  
43 therapy and investigate novel study endpoints, which could potentially shift the current paradigm of  
44 SLE treatment.  
45  
46  
47  
48  
49

50  
51 The objective of this study is to evaluate the efficacy, safety and tolerability of subcutaneous (SC)  
52 belimumab and a single cycle of rituximab administered in a combination regimen in adult patients  
53 with SLE compared with belimumab alone.  
54  
55  
56

## 57 **Methods and analysis**

58  
59  
60

### *Study design*

This is a Phase 3, multicentre, 3-arm, randomised, double-blind, placebo-controlled, 104-week superiority study (BEL205646; NCT03312907). There will be a 52-week double-blind treatment period followed by a 52-week double-blind observational treatment-free follow-up period in Arms A and B (to Week 104) (**Figure 1**). The study began recruitment in March 2018, with an estimated final completion in June 2021.

### *Study population*

Detailed inclusion and exclusion criteria are listed in **Table 1**. Briefly, patients must be  $\geq 18$  years of age, with a clinical diagnosis of SLE according to the American College of Rheumatology criteria, and a SLE Disease Activity Index (SLEDAI)-2K score  $\geq 6$  at screening. Patients with severe lupus nephritis or severe active central nervous system lupus will be excluded. Informed consent will be obtained from patients prior to the initiation of any study procedures or study-specific data collection.

### *Randomisation*

Patients will be randomised 1:2:1 to one of three treatment arms: belimumab plus placebo (Arm A, control), belimumab plus rituximab (Arm B, combination), or belimumab plus SoC (Arm C, reference). At randomisation, patients will be stratified by their screening SLEDAI-2K score ( $\leq 9$  vs  $\geq 10$ ), immunosuppressant use (immunosuppressant use vs no use), and corticosteroid dose (prednisone equivalent  $\leq 10$  mg/day vs  $>10$  mg/day). Randomisation, and the first dose of belimumab, should be completed within 35 days of the initiation of screening.

### *Blinding*

The study is double-blind with regards to whether participants are randomised to Arm A or Arm B. Randomisation to Arm C will not be blinded. To minimise bias given that Arm C is open-label, independent assessors blinded to treatment group will conduct the SLEDAI-2K assessments at selected visits for the primary and major secondary efficacy endpoints. Unblinded safety data will be reviewed regularly by an Independent Data Monitoring Committee.

### *Study treatments*

Patients randomised to Arm A (control) will receive belimumab SC 200 mg/week for 52 weeks with a cycle of intravenous (IV) placebo (rituximab matched; dose 1 at Week 4 and dose 2 at Week 6).

Patients randomised to Arm B (combination) will receive belimumab SC 200 mg/week for 52 weeks

1  
2  
3 with a cycle of rituximab IV (1000 mg doses given at Week 4 and Week 6). Patients randomised to  
4 Arm C (reference) will receive belimumab SC 200 mg/week plus SoC, including immunosuppressants,  
5 for 104 weeks. Patients in Arms A and B will be administered a pre-medication regimen 30 minutes  
6 before each placebo or rituximab infusion, consisting of methylprednisolone IV 100 mg or  
7 equivalent, an oral antihistamine, and acetaminophen or equivalent (**Table 2**).

8  
9  
10  
11  
12  
13 After completing Week 52, patients in Arms A and B will enter into the 52-week treatment-free  
14 (defined as no active treatment with belimumab and/or rituximab), observational phase of the study  
15 (Weeks 53 through 104). Patients in Arm C will continue to receive belimumab SC and stable  
16 immunosuppressants during this phase. In addition, treatment with antimalarials, non-steroidal anti-  
17 inflammatory drugs, and corticosteroids (prednisone equivalent  $\leq 5$  mg/day) is allowed in the  
18 observational phase in all three arms.

19  
20  
21  
22  
23  
24  
25 Patients considered treatment failures (patients in Arm A or B who fail to respond adequately to  
26 study treatment, who do not meet the corticosteroid taper rules or tolerate immunosuppressant  
27 withdrawal at Week 4, or who require additional therapy) will be encouraged to remain in the study  
28 to receive all safety and efficacy assessments through Week 104. During this time (Weeks 53–104),  
29 additional treatment may be given, if deemed of benefit by the investigator, to patients with  
30 responses that do not reach the predefined study criteria for disease control (as defined in the study  
31 endpoints), or subsequently experience increased disease activity. This treatment can include  
32 belimumab, corticosteroids, and/or immunosuppressants; additional treatment with rituximab will  
33 be permitted, but not encouraged.

#### 34 35 36 37 38 39 40 41 *Concomitant medications*

42  
43 Patients randomised to Arms A and B who enter the study on immunosuppressants will discontinue  
44 immunosuppressants at or prior to the Week 4 visit. Patients in Arm C who enter the study on stable  
45 immunosuppressants may continue to receive them throughout the study. After the initial 12 weeks  
46 of study treatment, a protocol-specified corticosteroid taper will be initiated for all three arms  
47 (carried out under direction of the investigator), with a target of reaching a prednisone equivalent  
48 dose of  $\leq 5$  mg/day by Week 26. After Week 26, if a patient's average daily corticosteroid dose  
49 exceeds 5 mg/day prednisone equivalent, the patient will be declared a treatment failure.  
50 Antimalarials and non-steroidal anti-inflammatory drugs may be used throughout the study for all  
51 treatment arms.  
52  
53  
54  
55  
56  
57  
58  
59  
60



1  
2  
3 Other investigational agents (or co-enrolment into another study of a different investigational  
4 agent), anti-tumour necrosis factor therapy, other biologics with effects on the immune system,  
5 immunoglobulin IV, cyclophosphamide IV, and plasmapheresis are prohibited throughout the study.  
6  
7  
8  
9

### 10 *Study endpoints*

11 The primary efficacy endpoint is the proportion of patients with disease control at Week 52, defined  
12 as a SLEDAI-2K score of  $\leq 2$ , achieved without immunosuppressants and with a prednisone equivalent  
13 dose of  $\leq 5$  mg/day. The major secondary efficacy endpoints are the proportion of patients in clinical  
14 remission at Week 64 (defined as a clinical SLEDAI-2K score of 0, allowing for serologies of anti-  
15 dsDNA and hypocomplementemia and achieved without immunosuppressants and corticosteroids),  
16 and the proportion of patients with disease control at Week 104 (defined as a SLEDAI-2K score of  $\leq 2$ ,  
17 achieved without immunosuppressants and with a prednisone-equivalent dose of  $\leq 5$  mg/day).  
18  
19

20 Patient reported outcome measures include change from baseline in Patient Global Assessment  
21 (PtGA), LupusQoL domain summary scores, and Functional Assessment of Chronic Illness Therapy  
22 (FACIT)-Fatigue score, and proportion of patients with an improvement in FACIT-Fatigue score  
23 exceeding the minimal clinically important difference. Safety endpoints include the incidence of  
24 adverse events (AEs), including serious AEs (SAEs) and AEs of special interest (AESI). The endpoints  
25 will be assessed using the measures listed in **Table 3**.  
26  
27  
28  
29  
30  
31  
32  
33  
34

### 35 *Sample size calculation*

36 Approximately 400 patients will be screened, with a goal of randomising at least 200 patients (50%  
37 screen failure rate). A target of 50 patients will be randomised in Arms A and C, and 100 patients in  
38 Arm B. This sample size provides at least 95% power (for the comparison of Arm B to Arm A at Week  
39 52) at a 5% level of significance, assuming the underlying response in the control arm is 10%, and the  
40 true population effect is  $\geq 25\%$  with treatment Arm B (assumed response rate of 35%). For the  
41 primary endpoint, patients who drop out from the study will be included in the analysis as non-  
42 responders; thus, the assumed responder rates for Arms A and B already account for the rate of  
43 patient dropout. However, to ensure adequate safety exposure in Arm B, the sample size may be  
44 increased up to 300 patients if the dropout rate reaches 10% at the scheduled time point for  
45 receiving both doses of placebo or rituximab.  
46  
47  
48  
49  
50  
51  
52  
53  
54

55 Based on limited clinical data with therapies including both belimumab and rituximab, opinions from  
56 external experts, and the rarity of remission or disease control seen in published studies, a rate of  
57 35% of patients in Arm B achieving a state of disease control is considered to be highly clinically  
58  
59  
60

1  
2  
3 significant in SLE care. A response rate of 10% at Week 52 was assumed for Arm A (control), based  
4 on historical data from three belimumab Phase 3 trials. Assuming a 10% control responder rate and  
5 50 patients in Arm A and 100 patients in Arm B, the minimum detectable effect at  $p < 0.05$  is a 12%  
6 improvement (i.e., an observed improvement of 12% or more in Arm B would give a  $p < 0.05$ ). A  
7 sample size sensitivity analysis was conducted on the primary endpoint to investigate the impact on  
8 power if the assumed underlying control response rate deviates from 10% or the treatment  
9 difference deviates from 25%.

### 16 *Statistical analyses*

17  
18 Unless otherwise stated, all analyses will be performed on the intent-to-treat population. The key  
19 analyses will compare belimumab with or without a single cycle of rituximab (Arm A vs Arm B).  
20 Descriptive statistics will be used to compare the combination of belimumab with a single cycle of  
21 rituximab (Arm B) versus belimumab with SoC (Arm C). The primary and major secondary endpoints  
22 will be compared using a logistic regression model. The independent variables will include treatment  
23 group, baseline SLEDAI-2K score ( $\leq 9$  vs  $\geq 10$ ), immunosuppressant use at baseline  
24 (immunosuppressant use vs no use), and baseline corticosteroid dose (prednisone equivalent  $\leq 10$   
25 mg/day vs  $> 10$  mg/day). If any factor fails to converge it will be removed from the logistic model. If  
26 the model fails to converge (e.g. owing to a small number of responders), the endpoints will be  
27 analysed using a Fisher's exact test. Missing data are accounted for in the primary efficacy endpoint,  
28 as all patients will be classified as either a non-responder (including premature study discontinuation  
29 or treatment failure prior to Week 52) or responder. Sensitivity analyses will be used to explore the  
30 impact of missing data and treatment failure imputation. Descriptive statistics will be used to  
31 summarise AEs, SAEs, AESI, changes in laboratory parameters, and immunogenicity.

### 43 *Ethical considerations*

44  
45 This study will be conducted in accordance with consensus ethical principles derived from  
46 international guidelines, including the Declaration of Helsinki and Council for International  
47 Organisations of Medical Sciences International Ethical Guidelines, applicable International  
48 Conference on Harmonisation Good Clinical Practice Guidelines, and applicable laws and regulations.  
49 The protocol has been reviewed and approved by institutional review boards (IRB)/independent  
50 ethics committees (IEC). The sponsor will comply with country-specific regulatory requirements  
51 relating to safety reporting to the regulatory authority, IRB/IEC, and investigators. SAEs will be  
52 reported by the investigator to the sponsor immediately, and no later than within 24 hours. Written  
53  
54  
55  
56  
57  
58  
59  
60

1  
2  
3 informed consent will be obtained from all patients, who will be assigned a unique identifier; all  
4 patient records and data transferred to the sponsor will contain the identifier only.  
5  
6  
7

### 8 *Dissemination*

9  
10 Study information will be publicly available at [www.clinicaltrials.gov](http://www.clinicaltrials.gov), and the results of this trial  
11 (positive and negative) will be submitted for publication in relevant peer-reviewed publications and  
12 the key findings presented at national and international conferences. Within 6 months of the  
13 publication of the primary manuscript for this study, anonymised individual participant data, the  
14 annotated case report form, protocol, reporting and analysis plan, data set specifications, raw  
15 dataset, analysis-ready dataset, and clinical study report will be available for research proposals  
16 approved by an independent review committee. Proposals should be submitted to  
17 [www.clinicalstudydatarequest.com](http://www.clinicalstudydatarequest.com). A data access agreement will be required. This paper complies  
18 with the Standard Protocol Items: Recommendations for Interventional Trials (SPIRIT)  
19 recommendations for protocol reporting.<sup>47</sup>  
20  
21  
22  
23  
24  
25  
26  
27

### 28 *Patient and public involvement*

29 Patients and/or public were not involved in the development of this study.  
30  
31  
32

### 33 **Discussion**

34  
35  
36 This study aims to explore the potential for synergy and to demonstrate greater efficacy of  
37 combination treatment with belimumab and rituximab compared with belimumab monotherapy in  
38 achieving low disease activity, disease remission, or clinical quiescence in patients with SLE.  
39 Although to date, combination biologics have not been widely used in other diseases, we think there  
40 is a strong immunological rationale to study belimumab and rituximab combination therapy in the  
41 context of SLE. The residual disease activity that many patients with SLE experience despite current  
42 therapies, further justifies the exploration of this novel combination treatment. If this study confirms  
43 our hypothesis that combined belimumab and rituximab treatment has additional efficacy over  
44 standard belimumab care, then this may transform the current treatment paradigm, allowing  
45 patients with SLE to discontinue conventional, often toxic medications.  
46  
47  
48  
49  
50  
51  
52  
53  
54

55 The unique sequence of administering belimumab and rituximab (which we believe will enhance B  
56 cell depletion), the use of belimumab SC and a larger sample size, differentiate the BLISS-BELIEVE  
57 study from BEAT Lupus (ISRCTN47873003),<sup>48</sup> a similar belimumab and rituximab combination  
58  
59  
60

1  
2  
3 therapy, Phase 2 trial in SLE that is currently recruiting patients in the UK. The sequence of  
4 treatment administration also differs from that used in the CALIBRATE trial in lupus nephritis  
5 (NCT02260934).<sup>49</sup> In addition, BLISS-BELIEVE is one of the first trials of belimumab to carry out  
6 assessments for 52 weeks after stopping treatment, and investigate ambitious, clinically relevant  
7 outcomes of low disease activity or disease remission. The 52-week observational, treatment-free  
8 phase provides an opportunity to observe if a true disease remission occurs, and allows for the  
9 assessment of the durability of any such remission or low disease activity. In the treatment of SLE, it  
10 is important to balance clinical efficacy and therapy-related toxicity. The unique design of BLISS-  
11 BELIEVE will ensure this is assessed through the use of rigorous endpoints (such as clinical  
12 remission), and by enabling the termination of belimumab if toxicity is an issue.

13  
14  
15  
16  
17  
18  
19  
20  
21 The unique treatment schedules were selected according to a rationale based on the current  
22 evidence. In the 52-week treatment phase, belimumab SC 200 mg will be administered weekly as per  
23 the treatment regimen in the Phase 3 study of belimumab SC, which demonstrated its safety and  
24 efficacy in patients with SLE.<sup>15</sup> Rituximab is not approved for the treatment of patients with SLE, and  
25 no standard dosing regimen has been established. Based on previous trials of rituximab that showed  
26 a lack of efficacy, we deemed that a rituximab-only arm would fail to meet standards of equipoise. In  
27 the current study, rituximab dosing will follow one cycle of the approved dosing recommendation  
28 for rheumatoid arthritis, which is two doses of 1000 mg IV given 2 weeks apart. In a Phase 2/3 trial,  
29 this rituximab regimen demonstrated rapid depletion of CD19-positive cells (<5 cells/ $\mu$ L) in the  
30 majority of patients with SLE.<sup>23</sup> It is also the dosing regimen recommended in NHS England's Interim  
31 Clinical Commissioning Policy Statement for rituximab use in patients with refractory SLE.<sup>50</sup>  
32 Furthermore, belimumab and rituximab combination treatment has previously shown acceptable  
33 safety and significant clinical responses in patients with severe, refractory SLE.<sup>46</sup>

34  
35  
36  
37  
38  
39  
40  
41  
42  
43  
44  
45 Separating the administration of belimumab and rituximab may allow for observation of safety  
46 events attributable to each treatment; however, owing to the relatively small sample size, the study  
47 will have limited power to detect less common AEs. With the consecutive administration regimen,  
48 the study allows investigation of the hypothesis that belimumab mobilises additional CD20+ B cells  
49 into the circulation, making them available for anti-CD20 treatment with rituximab. Therefore, we  
50 will be able to further establish whether more efficient depletion of autoreactive B cells, otherwise  
51 protected from cell death in the tissue niches, is achieved.<sup>37</sup> We anticipate that there will be fewer  
52 autoreactive B cells appearing in the memory B-cell compartment during the early phase of B-cell  
53 reconstitution. However, we are aware that the controls for this analysis are historical, owing to the  
54  
55  
56  
57  
58  
59  
60

1  
2  
3 ethical considerations discussed above. B-cell mobilisation will be evaluated by comparing baseline,  
4 pre-belimumab B-cell levels with autoreactive B cells appearing in peripheral blood after belimumab  
5 treatment. The possible reappearance of autoreactive B cells following rituximab treatment will then  
6 be established by comparing B cells levels between the belimumab only and belimumab and  
7 rituximab arms.  
8  
9

10  
11  
12  
13 This study has some limitations. Because rituximab is not approved for the treatment of patients  
14 with SLE, a rituximab-only arm could not be included in the protocol. Therefore, some clinical and  
15 serological outcomes attributable to rituximab treatment will not be assessed. However, this study  
16 aims to explore whether belimumab treatment can be optimised by sequential treatment with  
17 rituximab, for which a rituximab-only arm is not required. Another limitation of the study design is  
18 that direct measurements of B-cell depletion in tissue niches will not be performed. However, this  
19 measurement and a rituximab-only arm are being explored in a clinical trial of belimumab and  
20 rituximab combination therapy in primary Sjögren's syndrome (NCT02631538), which follows a  
21 similar administration regimen. Another concern is that patients in Study Arms A and B will  
22 discontinue immunosuppressants from Week 4, which might result in a higher than predicted  
23 treatment failure rate, due to flares occurring before belimumab and rituximab achieve therapeutic  
24 efficacy at Week 12. However, the risk of disease flares to patients will be mitigated by  
25 methylprednisolone pre-treatment and the option for investigators to adjust concomitant  
26 corticosteroid treatment as clinically necessary up to Week 26. Although substantially different from  
27 previous belimumab trials, such as BLISS 76, in which more than half the patients continued on  
28 background immunosuppressive agents,<sup>12</sup> this regimen will allow investigation of whether  
29 belimumab and rituximab combination therapy could result in an immunologically more favourable  
30 condition in some patients, thus enabling the tapering of conventional immunosuppressive drugs  
31 and possibly an immunosuppressant-free honeymoon. A positive outcome of BLISS-BELIEVE would  
32 further support the rationale to test this therapeutic strategy in Sjögren's syndrome and other  
33 autoantibody-dependent IMIDs.  
34  
35  
36  
37  
38  
39  
40  
41  
42  
43  
44  
45  
46  
47  
48  
49

50 In conclusion, the BLISS-BELIEVE study is supported by strong scientific rationale from pre-clinical  
51 studies, case reports and open-label trials. Its pioneering and unique design will allow for a long-  
52 term observation of true clinical remission, assessment of the durability of such a remission state,  
53 and assessment of any potential safety issues. The results of this study may support the rationale for  
54 combination therapy in other autoimmune conditions. BLISS-BELIEVE began recruitment in March  
55 2018, with estimated study completion in June 2021.  
56  
57  
58  
59  
60

**Contributors:**

**PPT** initiated this study and has been involved in its design. **YKOT, INB, RAF, RFvV, DG, JG, RBH, MO,** and **PPT** were involved in the development of the study protocol, preparation of the manuscript and its subsequent revisions, and provided final approval of the version published. **BD** was involved in the preparation of the manuscript and its subsequent revisions, and provided final approval of the version published. All authors agree to be accountable for all aspects of the work in ensuring that questions related to the accuracy or integrity of any part of the work are appropriately investigated and resolved.

**Funding:** This study (205646; NCT03312907) is being conducted and funded by GSK. Medical writing assistance was provided by Gosia Carless, PhD, of Fishawack Indicia Ltd, UK, funded by GSK.

**Competing interests:**

**YKOT's** work is funded by the Netherlands Scientific Organisation and the Dutch Kidney Foundation (KJPB12.028 & 17OKG04). **INB** is a National Institute for Health Research (NIHR) Senior Investigator and is funded by Arthritis Research UK and the NIHR Manchester Biomedical Research Centre; the views expressed in this publication are those of the author(s) and not necessarily those of the NHS, the NIHR or the Department of Health. **INB** has also received speaker's bureau and advisory board grants from UCB, has participated in advisory boards and steering committees for Astra Zeneca, is a member of Independent Data Safety Boards for Medimmune and Merck Serono, has received grants from Genzyme Sanofi, and has participated in advisory boards for Eli Lilly. **BD** is an investigator on the CALIBRATE study, which is sponsored by National Institute of Allergy and Infectious Diseases.

**RAF** has received grants and is a consultant for GSK and Genentech/Roche. **RFvV** has received grants and is a consultant for AbbVie, BMS, GSK, Pfizer, and UCB, and is a consultant for Celgene, Biotest, Janssen, Lilly, and Novartis. **DG** was an employee of GSK at the time of protocol development, and holds shares in BMS. **JG, RBH, MO** (and her husband), and **PPT** are employees of GSK and hold shares in the company. **RBH** has a patent pending (patent number WO 2017050833 A1) related to this work.

**Ethics approval:** The protocol has been approved by IRB/IEC. Each study site has obtained relevant IRB/IEC approvals.

1  
2  
3 **Figure 1: Study design**  
4  
5

6 IV, intravenous; PBO, placebo; RTX, rituximab; SC, subcutaneous; SoC, standard-of-care; W, week  
7  
8  
9  
10  
11  
12  
13  
14  
15  
16  
17  
18  
19  
20  
21  
22  
23  
24  
25  
26  
27  
28  
29  
30  
31  
32  
33  
34  
35  
36  
37  
38  
39  
40  
41  
42  
43  
44  
45  
46  
47  
48  
49  
50  
51  
52  
53  
54  
55  
56  
57  
58  
59  
60

For peer review only

**Table 1: Patient inclusion and exclusion criteria**

| <b>Inclusion criteria</b>                                                                                                                                                                                                                                          |
|--------------------------------------------------------------------------------------------------------------------------------------------------------------------------------------------------------------------------------------------------------------------|
| ≥18 years of age                                                                                                                                                                                                                                                   |
| Clinical diagnosis of SLE according to the ACR criteria                                                                                                                                                                                                            |
| Minimum screening SLEDAI-2K score ≥6                                                                                                                                                                                                                               |
| Unequivocally positive ANA and/or anti-dsDNA test results from two independent time points                                                                                                                                                                         |
| Stable SLE treatment regimen                                                                                                                                                                                                                                       |
| Female patients not pregnant, not breastfeeding, not of childbearing potential or follow contraceptive guidance                                                                                                                                                    |
| <b>Exclusion criteria</b>                                                                                                                                                                                                                                          |
| Symptomatic herpes zoster within 3 months prior to screening                                                                                                                                                                                                       |
| Active or latent TB, confirmed by medical history and examination, chest X-rays, and TB testing: either a positive TST (defined as a skin induration ≥5 mm at 48–72 hours, regardless of BCG or other vaccination history), or a positive QuantiFERON-TB Gold test |
| Allergies to humanised monoclonal antibodies                                                                                                                                                                                                                       |
| Clinically significant multiple or severe drug allergies and/or history of hypersensitivity to belimumab and/or rituximab                                                                                                                                          |
| Lymphoma, leukaemia, or any malignancy within the past 5 years                                                                                                                                                                                                     |
| ALT >2x ULN                                                                                                                                                                                                                                                        |
| Bilirubin >1.5x ULN                                                                                                                                                                                                                                                |
| IgA < 10 mg/dL                                                                                                                                                                                                                                                     |
| IgG < 250 mg/dL                                                                                                                                                                                                                                                    |
| Neutrophils < 1.5 x 10 <sup>9</sup>                                                                                                                                                                                                                                |
| Unstable liver or biliary disease                                                                                                                                                                                                                                  |
| Severe heart failure                                                                                                                                                                                                                                               |
| QTc >450 msec or >480 msec in patients with bundle branch block                                                                                                                                                                                                    |
| History of a major organ transplant                                                                                                                                                                                                                                |
| Clinical evidence of significant unstable or uncontrolled acute or chronic diseases not due to SLE                                                                                                                                                                 |
| Acute or chronic infection requiring management                                                                                                                                                                                                                    |
| Severe lupus kidney disease                                                                                                                                                                                                                                        |
| Severe active central nervous system lupus                                                                                                                                                                                                                         |
| Planned surgical procedure, laboratory abnormality, or condition that makes the patient unsuitable for the study                                                                                                                                                   |
| Evidence of serious suicide risk                                                                                                                                                                                                                                   |
| History of an anaphylaxis reaction to parenteral administration of contrast agents, human/murine proteins, or monoclonal antibodies                                                                                                                                |
| Live vaccine(s) within 1 month prior to screening                                                                                                                                                                                                                  |
| Within 364 days of Day 1, received certain biologics (belimumab, rituximab, abatacept, a B-cell-targeted therapy, a biologic investigational agent other than B-cell-targeted therapy), or required 3 or more courses of systemic corticosteroids                  |
| Within 90 days of Day 1, received anti-TNF therapy, interleukin-1 receptor antagonist, intravenous immunoglobulin, high-dose prednisone or equivalent, or plasmapheresis                                                                                           |
| Within 60 days of Day 1, received a non-biologic investigational agent, intravenous cyclophosphamide, a steroid injection                                                                                                                                          |



1  
2  
3 Positive HIV antibody test  
4 Positive serology for hepatitis B or hepatitis C  
5 Current or history (within 364 days of Day 1) of drug/alcohol dependence  
6 Sensitivity to any of the study treatments or components  
7  
8 Unable to administer belimumab by SC injection  
9

---

10  
11 ACR, American College of Rheumatology; ALT, alanine aminotransferase; ANA, anti-nuclear  
12 antibodies; BCG, Bacillus Calmette-Guerin; IgA, immunoglobulin A; HIV, human immunodeficiency  
13 virus; IgG, immunoglobulin G; SC, subcutaneous; QTc, corrected QT; SLE, systemic lupus  
14 erythematosus; SLEDAI-2K, SLE Disease Activity Index; TB, tuberculosis; TNF, tumour necrosis factor;  
15 TST, tuberculin skin test; ULN, upper limit of normal  
16  
17  
18  
19  
20  
21  
22  
23  
24  
25  
26  
27  
28  
29  
30  
31  
32  
33  
34  
35  
36  
37  
38  
39  
40  
41  
42  
43  
44  
45  
46  
47  
48  
49  
50  
51  
52  
53  
54  
55  
56  
57  
58  
59  
60

For peer review only

**Table 2: Study treatment arms**

| Treatment                                                                      | Arm A (control)                                                                                                | Arm B (combination)                                                                                            | Arm C (reference)                                                |
|--------------------------------------------------------------------------------|----------------------------------------------------------------------------------------------------------------|----------------------------------------------------------------------------------------------------------------|------------------------------------------------------------------|
| Belimumab                                                                      | Belimumab SC<br>200 mg/week for<br>52 weeks                                                                    | Belimumab SC<br>200 mg/week for<br>52 weeks                                                                    | Belimumab SC<br>200 mg/week plus SoC<br>for 104 weeks            |
| Rituximab or<br>matched placebo                                                | One cycle of placebo<br>IV (rituximab matched)<br>at Week 4 and Week 6                                         | One cycle of rituximab<br>IV 1000 mg at<br>Week 4 and Week 6                                                   | None                                                             |
| Pre-medication (30<br>minutes before each<br>placebo or rituximab<br>infusion) | Methylprednisolone IV<br>100 mg or equivalent,<br>oral antihistamine,<br>acetaminophen or<br>equivalent        | Methylprednisolone IV<br>100 mg or equivalent,<br>oral antihistamine,<br>acetaminophen or<br>equivalent        | None                                                             |
| Post Week 52<br>therapy                                                        | Antimalarials,<br>NSAIDs, and/or<br>corticosteroids with a<br>prednisone equivalent<br>dose of $\leq 5$ mg/day | Antimalarials,<br>NSAIDs, and/or<br>corticosteroids with a<br>prednisone equivalent<br>dose of $\leq 5$ mg/day | Continue<br>belimumab SC<br>200 mg/week plus<br>SoC <sup>a</sup> |

<sup>a</sup>Patients in Arm C are allowed to receive rescue therapy if, in the opinion of the investigator, they require additional treatment. This can include corticosteroids at  $>5$  mg/day prednisone equivalent

IV, intravenous; NSAIDs, non-steroidal anti-inflammatory drugs; SC, subcutaneous; SoC, standard-of-care

**Table 3: Study assessments**

|                                                                                                                                                                                                                                                                                                                                                                                                              |
|--------------------------------------------------------------------------------------------------------------------------------------------------------------------------------------------------------------------------------------------------------------------------------------------------------------------------------------------------------------------------------------------------------------|
| <b>Efficacy assessment</b>                                                                                                                                                                                                                                                                                                                                                                                   |
| SLEDAI-2K, a clinical index for measuring SLE disease activity in the previous 10 days, at screening/baseline and at Weeks 52, 64 and 104                                                                                                                                                                                                                                                                    |
| <b>Safety assessment</b>                                                                                                                                                                                                                                                                                                                                                                                     |
| Full physical examination, electrocardiogram, clinical safety laboratory assessments, neurological assessment, and suicidal risk monitoring (assessed via C-SSRS) at screening. Symptom-driven physical examination, vital signs, clinical safety laboratory assessments, neurological assessment, and suicidal risk monitoring at scheduled and unscheduled visits                                          |
| <b>Laboratory tests</b>                                                                                                                                                                                                                                                                                                                                                                                      |
| Anti-dsDNA/ANA, complement C3/C4, serum immunoglobulin (IgG, IgA, IgM), urine testing (urinalysis, spot urine protein), haematology and blood chemistry, pregnancy test: performed at screening and at each assessment visit. Autoantibody levels, including aCL, beta-2-glycoprotein, lupus anticoagulant, and extractable nuclear antigens, will be measured at Day 1 and Weeks 8, 26, 52, 60, 80, and 104 |
| <b>B-cell analyses</b>                                                                                                                                                                                                                                                                                                                                                                                       |
| <b>Pharmacokinetics</b>                                                                                                                                                                                                                                                                                                                                                                                      |
| aCL, anti-cardiolipin; ANA, anti-nuclear antibodies; C, complement; C-SSRS, Columbia-Suicide Severity Rating Scale; Ig, immunoglobulin; SLE, systemic lupus erythematosus; SLEDAI, SLE Disease Activity Index; SLE, systemic lupus erythematosus                                                                                                                                                             |

**References:**

1. Dorner T, Kinnman N, Tak PP. Targeting B cells in immune-mediated inflammatory disease: a comprehensive review of mechanisms of action and identification of biomarkers. *Pharmacology & therapeutics* 2010;125(3):464-75. doi: 10.1016/j.pharmthera.2010.01.001 [published Online First: 2010/01/26]
2. D'Cruz DP, Khamashta MA, Hughes GRV. Systemic lupus erythematosus. *The Lancet* 2007;369(9561):587-96. doi: 10.1016/S0140-6736(07)60279-7
3. Lau CS, Mak A. The socioeconomic burden of SLE. *Nature Rev Rheumatol* 2009;5:400. doi: 10.1038/nrrheum.2009.106  
<https://www.nature.com/articles/nrrheum.2009.106#supplementary-information>
4. Wilhelm TR, Magder LS, Petri M. Remission in systemic lupus erythematosus: durable remission is rare. *Ann Rheum Dis* 2017;76(3):547-53. doi: 10.1136/annrheumdis-2016-209489 [published Online First: 2016/08/26]
5. van Vollenhoven RF, Mosca M, Bertsias G, et al. Treat-to-target in systemic lupus erythematosus: recommendations from an international task force. *Ann Rheum Dis* 2014;73(6):958-67. doi: 10.1136/annrheumdis-2013-205139 [published Online First: 2014/04/18]
6. Gladman DD, Urowitz MB, Rahman P, et al. Accrual of organ damage over time in patients with systemic lupus erythematosus. *J Rheumatol* 2003;30(9):1955-59.
7. Oglesby A, Shaul AJ, Pokora T, et al. Adverse Event Burden, Resource Use, and Costs Associated with Immunosuppressant Medications for the Treatment of Systemic Lupus Erythematosus: A Systematic Literature Review. *Int J Rheumatol* 2013;2013:9. doi: 10.1155/2013/347520
8. Cheema GS, Roschke V, Hilbert DM, et al. Elevated serum B lymphocyte stimulator levels in patients with systemic immune-based rheumatic diseases. *Arthritis and rheumatism* 2001;44(6):1313-19. doi: 10.1002/1529-0131(200106)44:6<1313::AID-ART223>3.0.CO;2-S
9. Petri M, Stohl W, Chatham W, et al. Association of plasma B lymphocyte stimulator levels and disease activity in systemic lupus erythematosus. *Arthritis and rheumatism* 2008;58(8):2453-59. doi: 10.1002/art.23678
10. Zhang J, Roschke V, Baker KP, et al. Cutting Edge: A Role for B Lymphocyte Stimulator in Systemic Lupus Erythematosus. *J Immunol* 2001;166(1):6-10. doi: 10.4049/jimmunol.166.1.6
11. Roth DA, Thompson A, Tang Y, et al. Elevated BLYS levels in patients with systemic lupus erythematosus: Associated factors and responses to belimumab. *Lupus* 2016;25(4):346-54. doi: 10.1177/0961203315604909
12. Baker KP, Edwards BM, Main SH, et al. Generation and characterization of LymphoStat-B, a human monoclonal antibody that antagonizes the bioactivities of B lymphocyte stimulator. *Arthritis and rheumatism* 2003;48(11):3253-65. doi: 10.1002/art.11299
13. Furie R, Petri M, Zamani O, et al. A phase III, randomized, placebo-controlled study of belimumab, a monoclonal antibody that inhibits B lymphocyte stimulator, in patients with systemic lupus erythematosus. *Arthritis and rheumatism* 2011;63(12):3918-30. doi: 10.1002/art.30613
14. Navarra SV, Guzmán RM, Gallacher AE, et al. Efficacy and safety of belimumab in patients with active systemic lupus erythematosus: a randomised, placebo-

- controlled, phase 3 trial. *The Lancet* 2011;377(9767):721-31. doi: 10.1016/S0140-6736(10)61354-2
15. Stohl W, Schwarting A, Okada M, et al. Efficacy and Safety of Subcutaneous Belimumab in Systemic Lupus Erythematosus: A Fifty-Two-Week Randomized, Double-Blind, Placebo-Controlled Study. *Arthritis Rheumatol* 2017;69(5):1016-27. doi: 10.1002/art.40049
16. Zhang F, Bae S-C, Bass D, et al. A pivotal phase III, randomised, placebo-controlled study of belimumab in patients with systemic lupus erythematosus located in China, Japan and South Korea. *Ann Rheum Dis* 2018 doi: 10.1136/annrheumdis-2017-211631
17. Bruce IN, Urowitz M, van Vollenhoven R, et al. Long-term organ damage accrual and safety in patients with SLE treated with belimumab plus standard of care. *Lupus* 2016;25(7):699-709. doi: 10.1177/0961203315625119 [published Online First: 2016/03/05]
18. Anolik JH, Barnard J, Cappione A, et al. Rituximab improves peripheral B cell abnormalities in human systemic lupus erythematosus. *Arthritis and rheumatism* 2004;50(11):3580-90. doi: 10.1002/art.20592 [published Online First: 2004/11/06]
19. Cambridge G, Leandro MJ, Teodorescu M, et al. B cell depletion therapy in systemic lupus erythematosus: effect on autoantibody and antimicrobial antibody profiles. *Arthritis and rheumatism* 2006;54(11):3612-22. doi: 10.1002/art.22211 [published Online First: 2006/11/01]
20. Leandro MJ, Cambridge G, Edwards JC, et al. B-cell depletion in the treatment of patients with systemic lupus erythematosus: a longitudinal analysis of 24 patients. *Rheumatology (Oxford, England)* 2005;44(12):1542-5. doi: 10.1093/rheumatology/kei080 [published Online First: 2005/09/29]
21. Looney RJ, Anolik JH, Campbell D, et al. B cell depletion as a novel treatment for systemic lupus erythematosus: A phase I/II dose-escalation trial of rituximab. *Arthritis and rheumatism* 2004;50(8):2580-89. doi: 10.1002/art.20430
22. Smith KGC, Jones RB, Burns SM, et al. Long-term comparison of rituximab treatment for refractory systemic lupus erythematosus and vasculitis: Remission, relapse, and re-treatment. *Arthritis and rheumatism* 2006;54(9):2970-82. doi: 10.1002/art.22046
23. Merrill JT, Neuwelt CM, Wallace DJ, et al. Efficacy and safety of rituximab in moderately-to-severely active systemic lupus erythematosus: The randomized, double-blind, phase ii/iii systemic lupus erythematosus evaluation of rituximab trial. *Arthritis and rheumatism* 2010;62(1):222-33. doi: 10.1002/art.27233
24. Rovin BH, Furie R, Latinis K, et al. Efficacy and safety of rituximab in patients with active proliferative lupus nephritis: the Lupus Nephritis Assessment with Rituximab study. *Arthritis and rheumatism* 2012;64(4):1215-26. doi: 10.1002/art.34359 [published Online First: 2012/01/11]
25. Pijpe J, Meijer JM, Bootsma H, et al. Clinical and histologic evidence of salivary gland restoration supports the efficacy of rituximab treatment in Sjogren's syndrome. *Arthritis and rheumatism* 2009;60(11):3251-6. doi: 10.1002/art.24903 [published Online First: 2009/10/31]
26. Rehnberg M, Amu S, Tarkowski A, et al. Short- and long-term effects of anti-CD20 treatment on B cell ontogeny in bone marrow of patients with rheumatoid arthritis. *Arthritis research & therapy* 2009;11(4):R123. doi: 10.1186/ar2789 [published Online First: 2009/08/19]

- 1
- 2
- 3
- 4 27. Teng YK, Levarht EW, Hashemi M, et al. Immunohistochemical analysis as a means to
- 5 predict responsiveness to rituximab treatment. *Arthritis and rheumatism*
- 6 2007;56(12):3909-18. doi: 10.1002/art.22967 [published Online First: 2007/12/01]
- 7
- 8 28. Teng YKO, Levarht EWN, Toes REM, et al. Residual inflammation after rituximab
- 9 treatment is associated with sustained synovial plasma cell infiltration and enhanced
- 10 B cell repopulation. *Ann Rheum Dis* 2009;68(6):1011-16. doi:
- 11 10.1136/ard.2008.092791
- 12
- 13 29. Thurlings RM, Vos K, Wijbrandts CA, et al. Synovial tissue response to rituximab:
- 14 mechanism of action and identification of biomarkers of response. *Ann Rheum Dis*
- 15 2008;67(7):917-25. doi: 10.1136/ard.2007.080960 [published Online First:
- 16 2007/10/30]
- 17
- 18 30. Cambridge G, Isenberg DA, Edwards JC, et al. B cell depletion therapy in systemic lupus
- 19 erythematosus: relationships among serum B lymphocyte stimulator levels,
- 20 autoantibody profile and clinical response. *Ann Rheum Dis* 2008;67(7):1011-6. doi:
- 21 10.1136/ard.2007.079418 [published Online First: 2007/10/27]
- 22
- 23 31. Carter LM, Isenberg DA, Ehrenstein MR. Elevated Serum BAFF Levels Are Associated
- 24 With Rising Anti-Double-Stranded DNA Antibody Levels and Disease Flare Following
- 25 B Cell Depletion Therapy in Systemic Lupus Erythematosus. *Arthritis and rheumatism*
- 26 2013;65(10):2672-79. doi: 10.1002/art.38074
- 27
- 28 32. Cambridge G, Stohl W, Leandro MJ, et al. Circulating levels of B lymphocyte stimulator in
- 29 patients with rheumatoid arthritis following rituximab treatment: relationships with
- 30 B cell depletion, circulating antibodies, and clinical relapse. *Arthritis and rheumatism*
- 31 2006;54(3):723-32. doi: 10.1002/art.21650 [published Online First: 2006/03/02]
- 32
- 33 33. Lavie F, Miceli-Richard C, Ittah M, et al. Increase of B cell-activating factor of the TNF
- 34 family (BAFF) after rituximab treatment: insights into a new regulating system of
- 35 BAFF production. *Ann Rheum Dis* 2007;66(5):700-3. doi: 10.1136/ard.2006.060772
- 36 [published Online First: 2006/10/17]
- 37
- 38 34. Pollard RPE, Abdulahad WH, Vissink A, et al. Serum levels of BAFF, but not APRIL, are
- 39 increased after rituximab treatment in patients with primary Sjögren's syndrome:
- 40 data from a placebo-controlled clinical trial. *Ann Rheum Dis* 2013;72(1):146-48. doi:
- 41 10.1136/annrheumdis-2012-202071
- 42
- 43 35. Kawabata D, Venkatesh J, Ramanujam M, et al. Enhanced Selection of High Affinity DNA-
- 44 Reactive B Cells Following Cyclophosphamide Treatment in Mice. *PLoS ONE*
- 45 2010;5(1):e8418. doi: 10.1371/journal.pone.0008418
- 46
- 47 36. Ehrenstein MR, Wing C. The BAFFling effects of rituximab in lupus: danger ahead?
- 48 *Nature reviews Rheumatology* 2016;12(6):367-72. doi: 10.1038/nrrheum.2016.18
- 49 [published Online First: 2016/02/19]
- 50
- 51 37. Stohl W, Hiepe F, Latinis KM, et al. Belimumab reduces autoantibodies, normalizes low
- 52 complement levels, and reduces select B cell populations in patients with systemic
- 53 lupus erythematosus. *Arthritis and rheumatism* 2012;64(7):2328-37. doi:
- 54 10.1002/art.34400
- 55
- 56 38. Bekar KW, Owen T, Dunn R, et al. Prolonged effects of short-term anti-CD20 B cell
- 57 depletion therapy in murine systemic lupus erythematosus. *Arthritis and rheumatism*
- 58 2010;62(8):2443-57. doi: 10.1002/art.27515 [published Online First: 2010/05/28]
- 59
- 60 39. Gong Q, Ou Q, Ye S, et al. Importance of Cellular Microenvironment and Circulatory
- Dynamics in B Cell Immunotherapy. *J Immunol* 2005;174(2):817-26. doi:
- 10.4049/jimmunol.174.2.817

- 1  
2  
3  
4  
5  
6  
7  
8  
9  
10  
11  
12  
13  
14  
15  
16  
17  
18  
19  
20  
21  
22  
23  
24  
25  
26  
27  
28  
29  
30  
31  
32  
33  
34  
35  
36  
37  
38  
39  
40  
41  
42  
43  
44  
45  
46  
47  
48  
49  
50  
51  
52  
53  
54  
55  
56  
57  
58  
59  
60
40. Lin W, Seshasayee D, Lee WP, et al. Dual B Cell Immunotherapy Is Superior to Individual Anti-CD20 Depletion or BAFF Blockade in Murine Models of Spontaneous or Accelerated Lupus. *Arthritis Rheumatol* 2015;67(1):215-24. doi: 10.1002/art.38907
  41. De Vita S, Quartuccio L, Salvin S, et al. Sequential therapy with belimumab followed by rituximab in Sjogren's syndrome associated with B-cell lymphoproliferation and overexpression of BAFF: evidence for long-term efficacy. *Clinical and experimental rheumatology* 2014;32(4):490-4. [published Online First: 2014/05/08]
  42. Gonzalez-Echavarri C, Ugarte A, Ruiz-Irastorza G. Rituximab-refractory lupus nephritis successfully treated with belimumab. *Clinical and experimental rheumatology* 2016;34(2):355-6. [published Online First: 2016/02/18]
  43. Gualtierotti R, Borghi MO, Gerosa M, et al. Successful sequential therapy with rituximab and belimumab in patients with active systemic lupus erythematosus: a case series. *Clinical and experimental rheumatology* 2018 [published Online First: 2018/03/14]
  44. Kraaij T, Huizinga TWJ, Rabelink TJ, et al. Belimumab after rituximab as maintenance therapy in lupus nephritis. *Rheumatology* 2014;53(11):2122-24. doi: 10.1093/rheumatology/keu369
  45. Simonetta F, Allali D, Roux-Lombard P, et al. Successful treatment of refractory lupus nephritis by the sequential use of rituximab and belimumab. *Joint Bone Spine* 2017;84(2):235-36. doi: <https://doi.org/10.1016/j.jbspin.2016.01.008>
  46. Kraaij T KS, de Rooij ENM, Daele PLV, Bredewold OW, Bakker JA, Bajema I, Scherer HU, Toes REM, Huizinga TWJ, Rabelink T, van Kooten C, Teng YKO. Synergetic B-Cell Immunomodulation with Rituximab and Belimumab Combination Treatment in Severe, Refractory SLE. *Arthritis Rheumatol* 2017;69(suppl 10)
  47. Chan A, Tetzlaff JM, Altman DG, et al. SPIRIT 2013 statement: Defining standard protocol items for clinical trials. *Ann Intern Med* 2013;158(3):200-07. doi: 10.7326/0003-4819-158-3-201302050-00583
  48. BEAT Lupus. <https://beatlupusuk/>
  49. CALIBRATE. <http://calibratestudy.org/about-calibrate#.Ww7HKbpFzDd>.
  50. NHS. Interim Clinical Commissioning Policy Statement: Rituximab for the treatment of Systemic Lupus Erythematosus in adults. <https://www.england.nhs.uk/wp-content/uploads/2013/10/a13-ps-apdf2013>

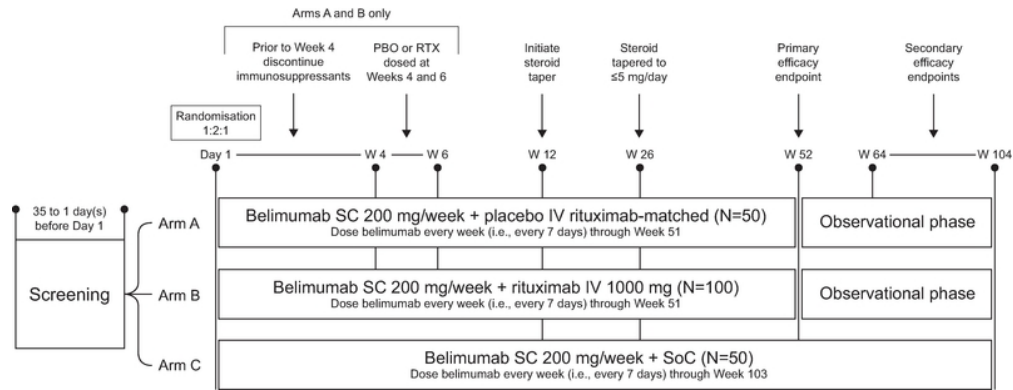

### Study Design

IV, intravenous; PBO, placebo; RTX, rituximab; SC, subcutaneous; SoC, standard-of-care; W, week

67x25mm (300 x 300 DPI)





SPIRIT 2013 Checklist: Recommended items to address in a clinical trial protocol and related documents\*

| Section/item                      | Item No | Description                                                                                                                                                                                                                                                                              | Addressed on page number in the manuscript |
|-----------------------------------|---------|------------------------------------------------------------------------------------------------------------------------------------------------------------------------------------------------------------------------------------------------------------------------------------------|--------------------------------------------|
| <b>Administrative information</b> |         |                                                                                                                                                                                                                                                                                          |                                            |
| Title                             | 1       | Descriptive title identifying the study design, population, interventions, and, if applicable, trial acronym                                                                                                                                                                             | ___1___                                    |
| Trial registration                | 2a      | Trial identifier and registry name. If not yet registered, name of intended registry                                                                                                                                                                                                     | __2 and 6__                                |
|                                   | 2b      | All items from the World Health Organization Trial Registration Data Set                                                                                                                                                                                                                 | Yes (protocol p.1)                         |
| Protocol version                  | 3       | Date and version identifier                                                                                                                                                                                                                                                              | Yes (protocol p.1)                         |
| Funding                           | 4       | Sources and types of financial, material, and other support                                                                                                                                                                                                                              | ___15___                                   |
| Roles and responsibilities        | 5a      | Names, affiliations, and roles of protocol contributors                                                                                                                                                                                                                                  | __1 and 15__                               |
|                                   | 5b      | Name and contact information for the trial sponsor                                                                                                                                                                                                                                       | Yes (protocol p.1)                         |
|                                   | 5c      | Role of study sponsor and funders, if any, in study design; collection, management, analysis, and interpretation of data; writing of the report; and the decision to submit the report for publication, including whether they will have ultimate authority over any of these activities | __15–16__                                  |
|                                   | 5d      | Composition, roles, and responsibilities of the coordinating centre, steering committee, endpoint adjudication committee, data management team, and other individuals or groups overseeing the trial, if applicable (see Item 21a for data monitoring committee)                         | Yes (protocol p.99)                        |

1  
2  
3  
4  
5  
6  
7  
8  
9  
10  
11  
12  
13  
14  
15  
16  
17  
18  
19  
20  
21  
22  
23  
24  
25  
26  
27  
28  
29  
30  
31  
32  
33  
34  
35  
36  
37  
38  
39  
40  
41  
42  
43  
44  
45  
46  
47

**Introduction**

|                          |    |                                                                                                                                                                                                           |             |
|--------------------------|----|-----------------------------------------------------------------------------------------------------------------------------------------------------------------------------------------------------------|-------------|
| Background and rationale | 6a | Description of research question and justification for undertaking the trial, including summary of relevant studies (published and unpublished) examining benefits and harms for each intervention        | ___4–5___   |
|                          | 6b | Explanation for choice of comparators                                                                                                                                                                     | ___13–14___ |
| Objectives               | 7  | Specific objectives or hypotheses                                                                                                                                                                         | ___5___     |
| Trial design             | 8  | Description of trial design including type of trial (eg, parallel group, crossover, factorial, single group), allocation ratio, and framework (eg, superiority, equivalence, noninferiority, exploratory) | ___6___     |

**Methods: Participants, interventions, and outcomes**

|                      |     |                                                                                                                                                                                                                                                                                                                                                                                |                                         |
|----------------------|-----|--------------------------------------------------------------------------------------------------------------------------------------------------------------------------------------------------------------------------------------------------------------------------------------------------------------------------------------------------------------------------------|-----------------------------------------|
| Study setting        | 9   | Description of study settings (eg, community clinic, academic hospital) and list of countries where data will be collected. Reference to where list of study sites can be obtained                                                                                                                                                                                             | Listed in the clinicaltrials.gov record |
| Eligibility criteria | 10  | Inclusion and exclusion criteria for participants. If applicable, eligibility criteria for study centres and individuals who will perform the interventions (eg, surgeons, psychotherapists)                                                                                                                                                                                   | ___6–7___                               |
| Interventions        | 11a | Interventions for each group with sufficient detail to allow replication, including how and when they will be administered                                                                                                                                                                                                                                                     | ___8–9___                               |
|                      | 11b | Criteria for discontinuing or modifying allocated interventions for a given trial participant (eg, drug dose change in response to harms, participant request, or improving/worsening disease)                                                                                                                                                                                 | ___9___                                 |
|                      | 11c | Strategies to improve adherence to intervention protocols, and any procedures for monitoring adherence (eg, drug tablet return, laboratory tests)                                                                                                                                                                                                                              | Yes (protocol p.58)                     |
|                      | 11d | Relevant concomitant care and interventions that are permitted or prohibited during the trial                                                                                                                                                                                                                                                                                  | ___9–10___                              |
| Outcomes             | 12  | Primary, secondary, and other outcomes, including the specific measurement variable (eg, systolic blood pressure), analysis metric (eg, change from baseline, final value, time to event), method of aggregation (eg, median, proportion), and time point for each outcome. Explanation of the clinical relevance of chosen efficacy and harm outcomes is strongly recommended | ___10–11___                             |

|    |                      |    |                                                                                                                                                                                       |                 |
|----|----------------------|----|---------------------------------------------------------------------------------------------------------------------------------------------------------------------------------------|-----------------|
| 1  |                      |    |                                                                                                                                                                                       |                 |
| 2  |                      |    |                                                                                                                                                                                       |                 |
| 3  | Participant timeline | 13 | Time schedule of enrolment, interventions (including any run-ins and washouts), assessments, and visits for participants. A schematic diagram is highly recommended (see Figure)      | _23 (Figure 1)_ |
| 4  |                      |    |                                                                                                                                                                                       |                 |
| 5  | Sample size          | 14 | Estimated number of participants needed to achieve study objectives and how it was determined, including clinical and statistical assumptions supporting any sample size calculations | ___11___        |
| 6  |                      |    |                                                                                                                                                                                       |                 |
| 7  |                      |    |                                                                                                                                                                                       |                 |
| 8  | Recruitment          | 15 | Strategies for achieving adequate participant enrolment to reach target sample size                                                                                                   | ___N/A___       |
| 9  |                      |    |                                                                                                                                                                                       |                 |
| 10 |                      |    |                                                                                                                                                                                       |                 |

### 11 **Methods: Assignment of interventions (for controlled trials)**

#### 12 Allocation:

|    |                                  |     |                                                                                                                                                                                                                                                                                                                                                          |                     |
|----|----------------------------------|-----|----------------------------------------------------------------------------------------------------------------------------------------------------------------------------------------------------------------------------------------------------------------------------------------------------------------------------------------------------------|---------------------|
| 13 |                                  |     |                                                                                                                                                                                                                                                                                                                                                          |                     |
| 14 |                                  |     |                                                                                                                                                                                                                                                                                                                                                          |                     |
| 15 | Sequence generation              | 16a | Method of generating the allocation sequence (eg, computer-generated random numbers), and list of any factors for stratification. To reduce predictability of a random sequence, details of any planned restriction (eg, blocking) should be provided in a separate document that is unavailable to those who enrol participants or assign interventions | Yes (protocol p.56) |
| 16 |                                  |     |                                                                                                                                                                                                                                                                                                                                                          |                     |
| 17 |                                  |     |                                                                                                                                                                                                                                                                                                                                                          |                     |
| 18 |                                  |     |                                                                                                                                                                                                                                                                                                                                                          |                     |
| 19 |                                  |     |                                                                                                                                                                                                                                                                                                                                                          |                     |
| 20 | Allocation concealment mechanism | 16b | Mechanism of implementing the allocation sequence (eg, central telephone; sequentially numbered, opaque, sealed envelopes), describing any steps to conceal the sequence until interventions are assigned                                                                                                                                                | Yes (protocol p.56) |
| 21 |                                  |     |                                                                                                                                                                                                                                                                                                                                                          |                     |
| 22 |                                  |     |                                                                                                                                                                                                                                                                                                                                                          |                     |
| 23 |                                  |     |                                                                                                                                                                                                                                                                                                                                                          |                     |
| 24 | Implementation                   | 16c | Who will generate the allocation sequence, who will enrol participants, and who will assign participants to interventions                                                                                                                                                                                                                                | Yes (protocol p.56) |
| 25 |                                  |     |                                                                                                                                                                                                                                                                                                                                                          |                     |
| 26 |                                  |     |                                                                                                                                                                                                                                                                                                                                                          |                     |
| 27 | Blinding (masking)               | 17a | Who will be blinded after assignment to interventions (eg, trial participants, care providers, outcome assessors, data analysts), and how                                                                                                                                                                                                                | Yes (protocol p.56) |
| 28 |                                  |     |                                                                                                                                                                                                                                                                                                                                                          |                     |
| 29 |                                  |     |                                                                                                                                                                                                                                                                                                                                                          |                     |
| 30 |                                  | 17b | If blinded, circumstances under which unblinding is permissible, and procedure for revealing a participant's allocated intervention during the trial                                                                                                                                                                                                     | Yes (protocol p.57) |
| 31 |                                  |     |                                                                                                                                                                                                                                                                                                                                                          |                     |
| 32 |                                  |     |                                                                                                                                                                                                                                                                                                                                                          |                     |
| 33 |                                  |     |                                                                                                                                                                                                                                                                                                                                                          |                     |

### 34 **Methods: Data collection, management, and analysis**

|    |                         |     |                                                                                                                                                                                                                                                                                                                                                                                                              |                      |
|----|-------------------------|-----|--------------------------------------------------------------------------------------------------------------------------------------------------------------------------------------------------------------------------------------------------------------------------------------------------------------------------------------------------------------------------------------------------------------|----------------------|
| 35 |                         |     |                                                                                                                                                                                                                                                                                                                                                                                                              |                      |
| 36 | Data collection methods | 18a | Plans for assessment and collection of outcome, baseline, and other trial data, including any related processes to promote data quality (eg, duplicate measurements, training of assessors) and a description of study instruments (eg, questionnaires, laboratory tests) along with their reliability and validity, if known. Reference to where data collection forms can be found, if not in the protocol | Yes (protocol p.100) |
| 37 |                         |     |                                                                                                                                                                                                                                                                                                                                                                                                              |                      |
| 38 |                         |     |                                                                                                                                                                                                                                                                                                                                                                                                              |                      |
| 39 |                         |     |                                                                                                                                                                                                                                                                                                                                                                                                              |                      |
| 40 |                         |     |                                                                                                                                                                                                                                                                                                                                                                                                              |                      |
| 41 |                         |     |                                                                                                                                                                                                                                                                                                                                                                                                              |                      |
| 42 |                         |     |                                                                                                                                                                                                                                                                                                                                                                                                              |                      |
| 43 |                         |     |                                                                                                                                                                                                                                                                                                                                                                                                              |                      |
| 44 |                         |     |                                                                                                                                                                                                                                                                                                                                                                                                              |                      |
| 45 |                         |     |                                                                                                                                                                                                                                                                                                                                                                                                              |                      |
| 46 |                         |     |                                                                                                                                                                                                                                                                                                                                                                                                              |                      |
| 47 |                         |     |                                                                                                                                                                                                                                                                                                                                                                                                              |                      |

|    |                                 |     |                                                                                                                                                                                                                                                                                                                                       |                      |
|----|---------------------------------|-----|---------------------------------------------------------------------------------------------------------------------------------------------------------------------------------------------------------------------------------------------------------------------------------------------------------------------------------------|----------------------|
| 1  |                                 |     |                                                                                                                                                                                                                                                                                                                                       |                      |
| 2  |                                 |     |                                                                                                                                                                                                                                                                                                                                       |                      |
| 3  |                                 | 18b | Plans to promote participant retention and complete follow-up, including list of any outcome data to be collected for participants who discontinue or deviate from intervention protocols                                                                                                                                             | ___7___              |
| 4  |                                 |     |                                                                                                                                                                                                                                                                                                                                       |                      |
| 5  | Data management                 | 19  | Plans for data entry, coding, security, and storage, including any related processes to promote data quality (eg, double data entry; range checks for data values). Reference to where details of data management procedures can be found, if not in the protocol                                                                     | Yes (protocol p.100) |
| 6  |                                 |     |                                                                                                                                                                                                                                                                                                                                       |                      |
| 7  |                                 |     |                                                                                                                                                                                                                                                                                                                                       |                      |
| 8  |                                 |     |                                                                                                                                                                                                                                                                                                                                       |                      |
| 9  |                                 |     |                                                                                                                                                                                                                                                                                                                                       |                      |
| 10 | Statistical methods             | 20a | Statistical methods for analysing primary and secondary outcomes. Reference to where other details of the statistical analysis plan can be found, if not in the protocol                                                                                                                                                              | ___9___              |
| 11 |                                 |     |                                                                                                                                                                                                                                                                                                                                       |                      |
| 12 |                                 |     |                                                                                                                                                                                                                                                                                                                                       |                      |
| 13 |                                 | 20b | Methods for any additional analyses (eg, subgroup and adjusted analyses)                                                                                                                                                                                                                                                              | ___N/A___            |
| 14 |                                 |     |                                                                                                                                                                                                                                                                                                                                       |                      |
| 15 |                                 | 20c | Definition of analysis population relating to protocol non-adherence (eg, as randomised analysis), and any statistical methods to handle missing data (eg, multiple imputation)                                                                                                                                                       | ___9___              |
| 16 |                                 |     |                                                                                                                                                                                                                                                                                                                                       |                      |
| 17 |                                 |     |                                                                                                                                                                                                                                                                                                                                       |                      |
| 18 | <b>Methods: Monitoring</b>      |     |                                                                                                                                                                                                                                                                                                                                       |                      |
| 19 |                                 |     |                                                                                                                                                                                                                                                                                                                                       |                      |
| 20 | Data monitoring                 | 21a | Composition of data monitoring committee (DMC); summary of its role and reporting structure; statement of whether it is independent from the sponsor and competing interests; and reference to where further details about its charter can be found, if not in the protocol. Alternatively, an explanation of why a DMC is not needed | Yes (protocol p.99)  |
| 21 |                                 |     |                                                                                                                                                                                                                                                                                                                                       |                      |
| 22 |                                 |     |                                                                                                                                                                                                                                                                                                                                       |                      |
| 23 |                                 |     |                                                                                                                                                                                                                                                                                                                                       |                      |
| 24 |                                 |     |                                                                                                                                                                                                                                                                                                                                       |                      |
| 25 |                                 | 21b | Description of any interim analyses and stopping guidelines, including who will have access to these interim results and make the final decision to terminate the trial                                                                                                                                                               | Yes (protocol p.88)  |
| 26 |                                 |     |                                                                                                                                                                                                                                                                                                                                       |                      |
| 27 |                                 |     |                                                                                                                                                                                                                                                                                                                                       |                      |
| 28 | Harms                           | 22  | Plans for collecting, assessing, reporting, and managing solicited and spontaneously reported adverse events and other unintended effects of trial interventions or trial conduct                                                                                                                                                     | ___9–10___           |
| 29 |                                 |     |                                                                                                                                                                                                                                                                                                                                       |                      |
| 30 |                                 |     |                                                                                                                                                                                                                                                                                                                                       |                      |
| 31 | Auditing                        | 23  | Frequency and procedures for auditing trial conduct, if any, and whether the process will be independent from investigators and the sponsor                                                                                                                                                                                           | Yes (protocol p.88)  |
| 32 |                                 |     |                                                                                                                                                                                                                                                                                                                                       |                      |
| 33 |                                 |     |                                                                                                                                                                                                                                                                                                                                       |                      |
| 34 |                                 |     |                                                                                                                                                                                                                                                                                                                                       |                      |
| 35 | <b>Ethics and dissemination</b> |     |                                                                                                                                                                                                                                                                                                                                       |                      |
| 36 |                                 |     |                                                                                                                                                                                                                                                                                                                                       |                      |
| 37 | Research ethics approval        | 24  | Plans for seeking research ethics committee/institutional review board (REC/IRB) approval                                                                                                                                                                                                                                             | ___9___              |
| 38 |                                 |     |                                                                                                                                                                                                                                                                                                                                       |                      |
| 39 |                                 |     |                                                                                                                                                                                                                                                                                                                                       |                      |
| 40 |                                 |     |                                                                                                                                                                                                                                                                                                                                       |                      |
| 41 |                                 |     |                                                                                                                                                                                                                                                                                                                                       |                      |
| 42 |                                 |     |                                                                                                                                                                                                                                                                                                                                       |                      |
| 43 |                                 |     |                                                                                                                                                                                                                                                                                                                                       |                      |
| 44 |                                 |     |                                                                                                                                                                                                                                                                                                                                       |                      |
| 45 |                                 |     |                                                                                                                                                                                                                                                                                                                                       |                      |
| 46 |                                 |     |                                                                                                                                                                                                                                                                                                                                       |                      |
| 47 |                                 |     |                                                                                                                                                                                                                                                                                                                                       |                      |

|    |                               |     |                                                                                                                                                                                                                                                                                     |                     |
|----|-------------------------------|-----|-------------------------------------------------------------------------------------------------------------------------------------------------------------------------------------------------------------------------------------------------------------------------------------|---------------------|
| 1  |                               |     |                                                                                                                                                                                                                                                                                     |                     |
| 2  |                               |     |                                                                                                                                                                                                                                                                                     |                     |
| 3  | Protocol amendments           | 25  | Plans for communicating important protocol modifications (eg, changes to eligibility criteria, outcomes, analyses) to relevant parties (eg, investigators, REC/IRBs, trial participants, trial registries, journals, regulators)                                                    | Yes (protocol p.98) |
| 4  |                               |     |                                                                                                                                                                                                                                                                                     |                     |
| 5  |                               |     |                                                                                                                                                                                                                                                                                     |                     |
| 6  |                               |     |                                                                                                                                                                                                                                                                                     |                     |
| 7  | Consent or assent             | 26a | Who will obtain informed consent or assent from potential trial participants or authorised surrogates, and how (see Item 32)                                                                                                                                                        | Yes (protocol p.98) |
| 8  |                               |     |                                                                                                                                                                                                                                                                                     |                     |
| 9  |                               |     |                                                                                                                                                                                                                                                                                     |                     |
| 10 |                               | 26b | Additional consent provisions for collection and use of participant data and biological specimens in ancillary studies, if applicable                                                                                                                                               | ___ n/a ___         |
| 11 |                               |     |                                                                                                                                                                                                                                                                                     |                     |
| 12 |                               |     |                                                                                                                                                                                                                                                                                     |                     |
| 13 | Confidentiality               | 27  | How personal information about potential and enrolled participants will be collected, shared, and maintained in order to protect confidentiality before, during, and after the trial                                                                                                | ___ 9–10 ___        |
| 14 |                               |     |                                                                                                                                                                                                                                                                                     |                     |
| 15 |                               |     |                                                                                                                                                                                                                                                                                     |                     |
| 16 | Declaration of interests      | 28  | Financial and other competing interests for principal investigators for the overall trial and each study site                                                                                                                                                                       | ___ 13 ___          |
| 17 |                               |     |                                                                                                                                                                                                                                                                                     |                     |
| 18 |                               |     |                                                                                                                                                                                                                                                                                     |                     |
| 19 | Access to data                | 29  | Statement of who will have access to the final trial dataset, and disclosure of contractual agreements that limit such access for investigators                                                                                                                                     | Yes (protocol p.88) |
| 20 |                               |     |                                                                                                                                                                                                                                                                                     |                     |
| 21 |                               |     |                                                                                                                                                                                                                                                                                     |                     |
| 22 | Ancillary and post-trial care | 30  | Provisions, if any, for ancillary and post-trial care, and for compensation to those who suffer harm from trial participation                                                                                                                                                       | ___ N/A ___         |
| 23 |                               |     |                                                                                                                                                                                                                                                                                     |                     |
| 24 |                               |     |                                                                                                                                                                                                                                                                                     |                     |
| 25 | Dissemination policy          | 31a | Plans for investigators and sponsor to communicate trial results to participants, healthcare professionals, the public, and other relevant groups (eg, via publication, reporting in results databases, or other data sharing arrangements), including any publication restrictions | ___ 10 ___          |
| 26 |                               |     |                                                                                                                                                                                                                                                                                     |                     |
| 27 |                               |     |                                                                                                                                                                                                                                                                                     |                     |
| 28 |                               |     |                                                                                                                                                                                                                                                                                     |                     |
| 29 |                               | 31b | Authorship eligibility guidelines and any intended use of professional writers                                                                                                                                                                                                      | ___ 13 ___          |
| 30 |                               |     |                                                                                                                                                                                                                                                                                     |                     |
| 31 |                               | 31c | Plans, if any, for granting public access to the full protocol, participant-level dataset, and statistical code                                                                                                                                                                     | ___ 10 ___          |
| 32 |                               |     |                                                                                                                                                                                                                                                                                     |                     |
| 33 | <b>Appendices</b>             |     |                                                                                                                                                                                                                                                                                     |                     |
| 34 |                               |     |                                                                                                                                                                                                                                                                                     |                     |
| 35 | Informed consent materials    | 32  | Model consent form and other related documentation given to participants and authorised surrogates                                                                                                                                                                                  | ___ No ___          |
| 36 |                               |     |                                                                                                                                                                                                                                                                                     |                     |
| 37 |                               |     |                                                                                                                                                                                                                                                                                     |                     |
| 38 | Biological specimens          | 33  | Plans for collection, laboratory evaluation, and storage of biological specimens for genetic or molecular analysis in the current trial and for future use in ancillary studies, if applicable                                                                                      | Yes (protocol)      |
| 39 |                               |     |                                                                                                                                                                                                                                                                                     |                     |
| 40 |                               |     |                                                                                                                                                                                                                                                                                     |                     |
| 41 |                               |     |                                                                                                                                                                                                                                                                                     |                     |
| 42 |                               |     |                                                                                                                                                                                                                                                                                     |                     |
| 43 |                               |     |                                                                                                                                                                                                                                                                                     |                     |
| 44 |                               |     |                                                                                                                                                                                                                                                                                     |                     |
| 45 |                               |     |                                                                                                                                                                                                                                                                                     |                     |
| 46 |                               |     |                                                                                                                                                                                                                                                                                     |                     |
| 47 |                               |     |                                                                                                                                                                                                                                                                                     |                     |

1  
2  
3  
4  
5  
6  
7  
8  
9  
10  
11  
12  
13  
14  
15  
16  
17  
18  
19  
20  
21  
22  
23  
24  
25  
26  
27  
28  
29  
30  
31  
32  
33  
34  
35  
36  
37  
38  
39  
40  
41  
42  
43  
44  
45  
46  
47

\*It is strongly recommended that this checklist be read in conjunction with the SPIRIT 2013 Explanation & Elaboration for important clarification on the items. Amendments to the protocol should be tracked and dated. The SPIRIT checklist is copyrighted by the SPIRIT Group under the Creative Commons "[Attribution-NonCommercial-NoDerivs 3.0 Unported](#)" license.

For peer review only
